# Supplementary material
Source: PubMed Central journal article supplement (PMC2852487)

## Supporting Information

### Amaranzoles B-F, Imidazole-2-carboxy Steroids from the Marine Sponge, *Phorbas amaranthus*. C24-N- and C24-O-Analogs from a Divergent Oxidative Biosynthesis.

Brandon I. Morinaka,<sup>‡</sup> Joseph R. Pawlik<sup>§</sup> and Tadeusz F. Molinski<sup>‡, 1,\*</sup>

<sup>‡</sup>*Department of Chemistry and Biochemistry, and <sup>1</sup>Skaggs School of Pharmacy and Pharmaceutical Sciences, University of California, San Diego, La Jolla, California 92093-0358, and <sup>§</sup>Department of Biology and Marine Biology, Center for Marine Science, University of North Carolina Wilmington, 5600 Marvin K. Moss Lane, North Carolina 28403-3297*

|      |     |                                                                                           |
|------|-----|-------------------------------------------------------------------------------------------|
| Page | S1  | Contents                                                                                  |
|      | S2  | Figure S1. <sup>1</sup> H NMR spectrum for amaranzole B ( <b>2</b> )                      |
|      | S3  | Figure S2. DQF-COSY spectrum for amaranzole B ( <b>2</b> )                                |
|      | S4  | Figure S3. gHSQC spectrum for amaranzole B ( <b>2</b> )                                   |
|      | S5  | Figure S4. gHMBC spectrum for amaranzole B ( <b>2</b> )                                   |
|      | S6  | Figure S5. <sup>1</sup> H NMR spectrum for amaranzole C ( <b>3</b> )                      |
|      | S7  | Figure S6. <sup>1</sup> H NMR spectrum for amaranzole D ( <b>4</b> )                      |
|      | S8  | Figure S7. <sup>1</sup> H NMR spectrum for amaranzole E ( <b>5</b> )                      |
|      | S9  | Figure S8. <sup>1</sup> H NMR spectrum for amaranzole F ( <b>6</b> )                      |
|      | S10 | Figure S9. <sup>1</sup> H NMR spectrum for <i>N,O</i> -dimethyl-amaranzole B ( <b>7</b> ) |
|      | S11 | Figure S10. <sup>1</sup> H NMR spectrum for compound <b>14</b>                            |
|      | S12 | Figure S11. <sup>13</sup> C NMR spectrum for compound <b>14</b>                           |
|      | S13 | Figure S12. <sup>1</sup> H NMR spectrum for compound <b>15a</b>                           |
|      | S14 | Figure S13. <sup>13</sup> C NMR spectrum for compound <b>15a</b>                          |
|      | S15 | Figure S14. <sup>1</sup> H NMR spectrum for compound <b>15b</b>                           |
|      | S16 | Figure S15. <sup>13</sup> C NMR spectrum for compound <b>15b</b>                          |
|      | S17 | Figure S16. <sup>1</sup> H NMR spectrum for compound <b>10</b>                            |
|      | S18 | Figure S17. <sup>13</sup> C NMR spectrum for compound <b>10</b>                           |
|      | S19 | Figure S18. <sup>1</sup> H NMR spectrum for compound ( $\pm$ )- <b>8</b>                  |
|      | S20 | Figure S19. <sup>13</sup> C NMR spectrum for compound ( $\pm$ )- <b>8</b>                 |
|      | S21 | Figure S20. <sup>1</sup> H NMR spectrum for compound ( $-$ )-( <i>R</i> )- <b>9</b>       |
|      | S22 | Figure S21. <sup>13</sup> C NMR spectrum for compound ( $-$ )-( <i>R</i> )- <b>9</b>      |
|      | S23 | Figure S22. <sup>1</sup> H NMR spectrum for compound <b>17</b>                            |

Figure S1.  $^1\text{H}$  NMR spectrum for amaranzole B (**2**) in  $\text{CD}_3\text{OD}$  at 600 MHz

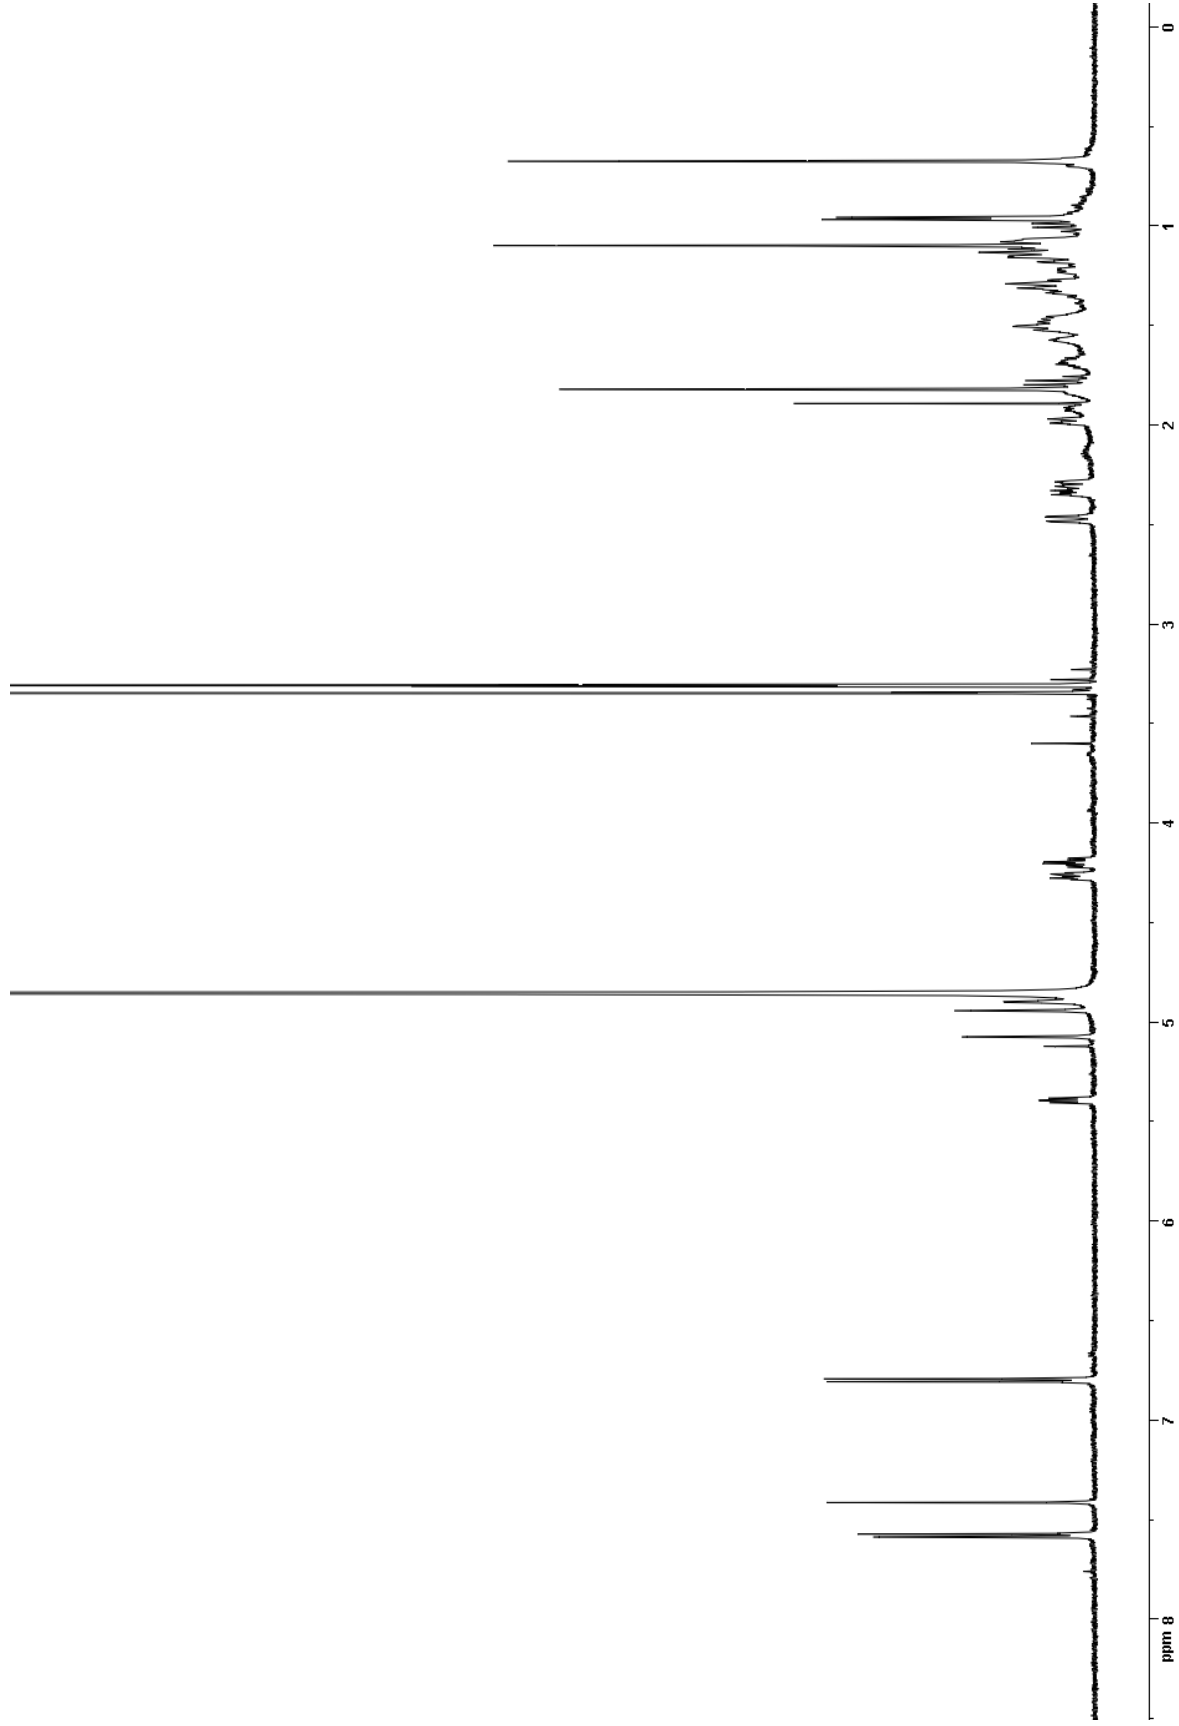

Figure S2. DQF-COSY spectrum for amaranzole B (2) in CD<sub>3</sub>OD at 600 MHz

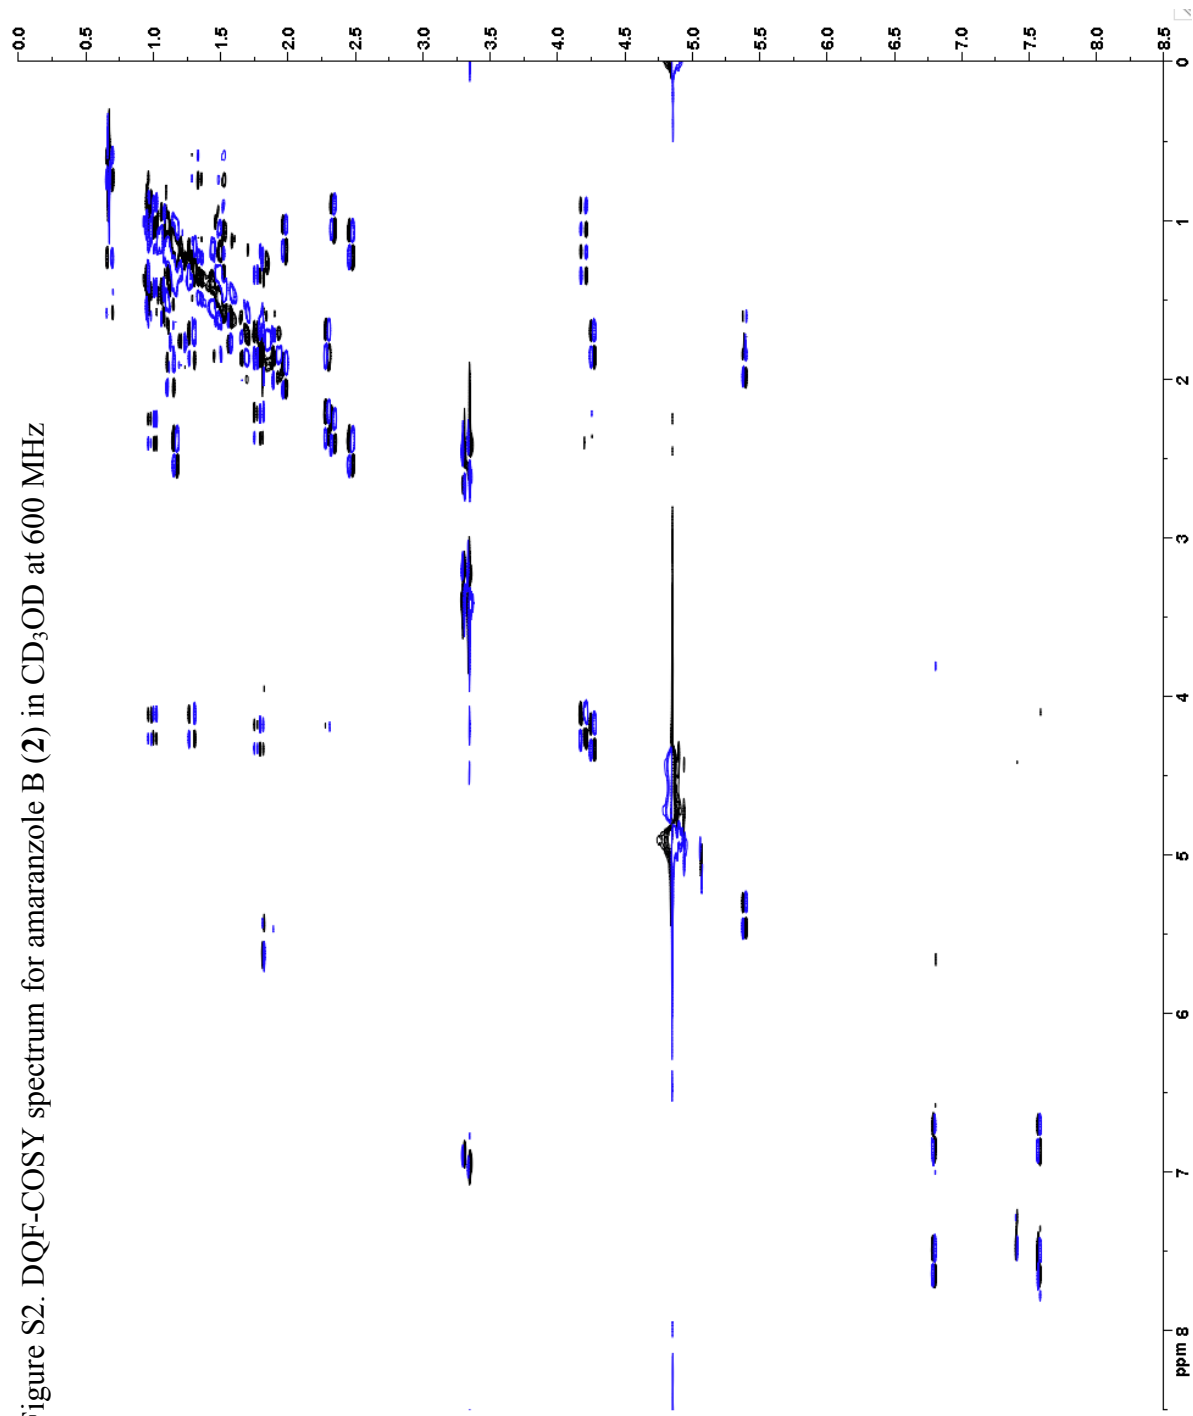

Figure S3. gHSQC spectrum for amaranzole B (2) in CD<sub>3</sub>OD at 600 MHz

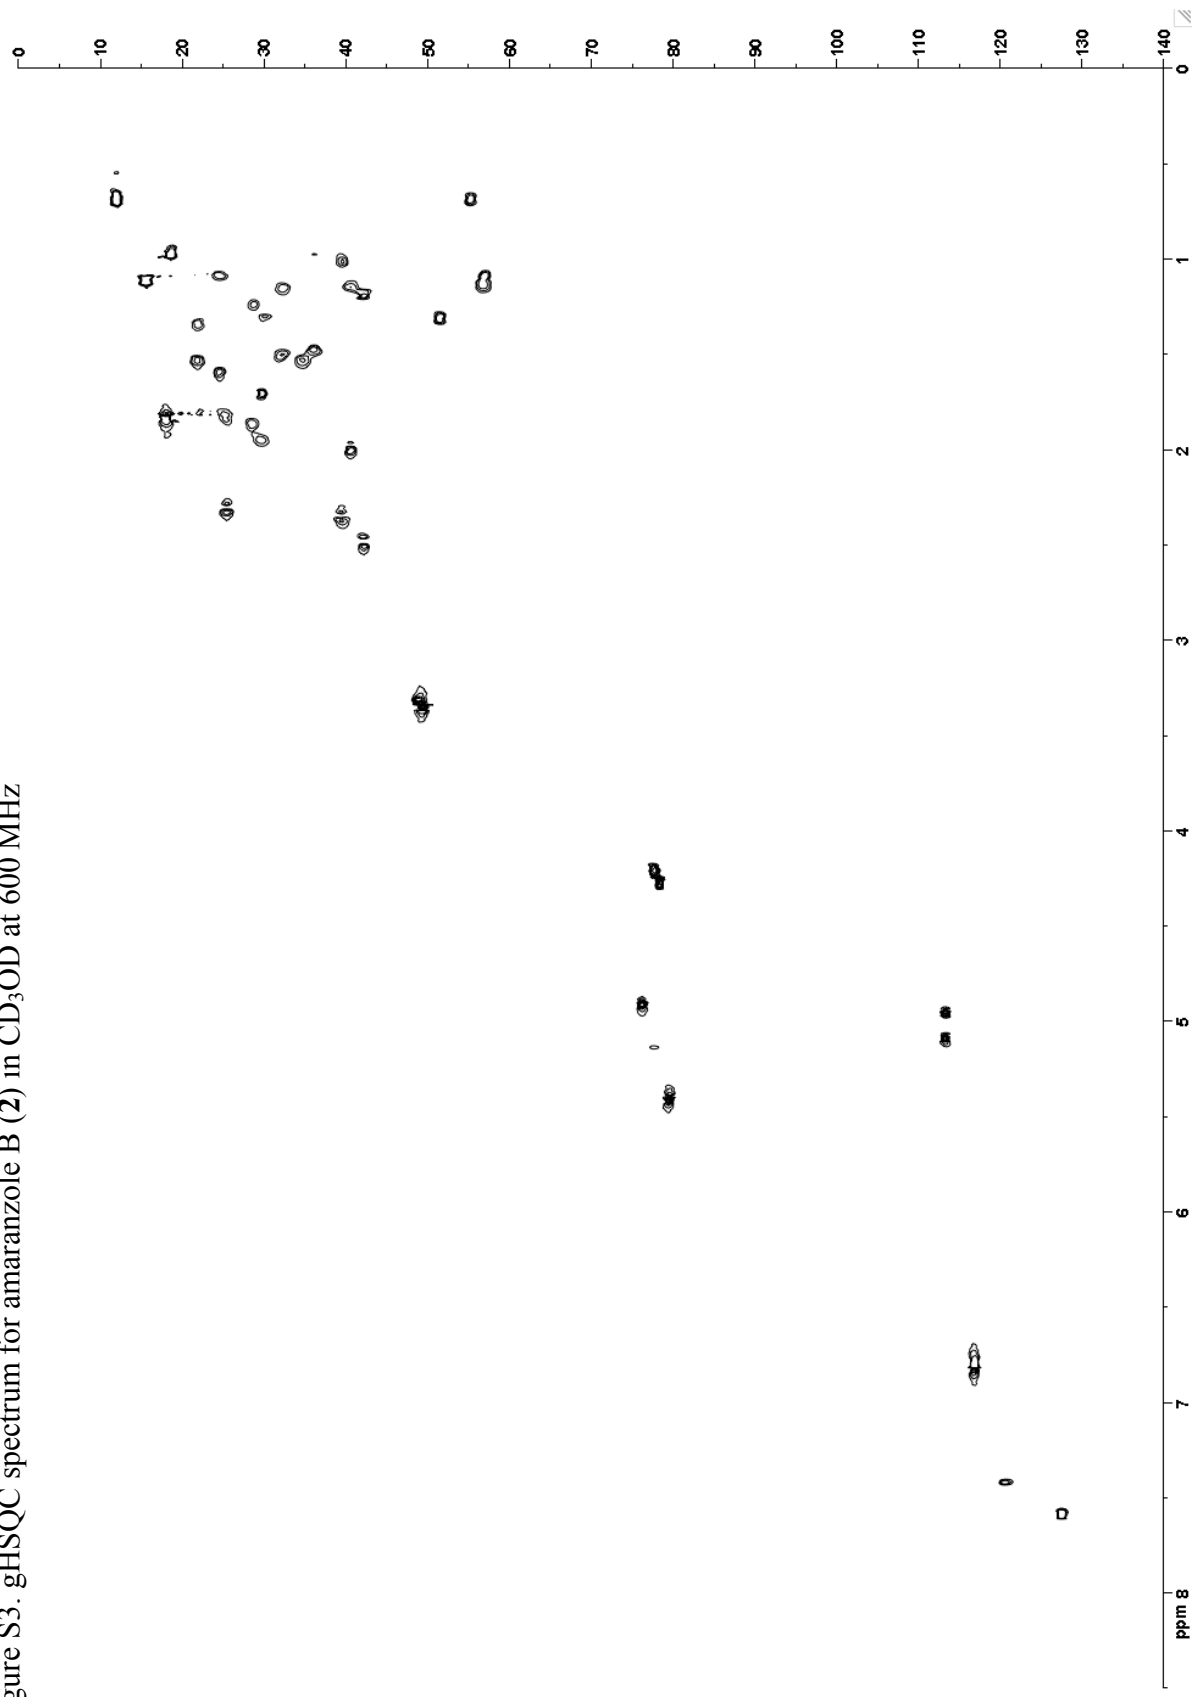

Figure S4. gHMBC spectrum for amaranzole B (2) in CD<sub>3</sub>OD at 600 MHz

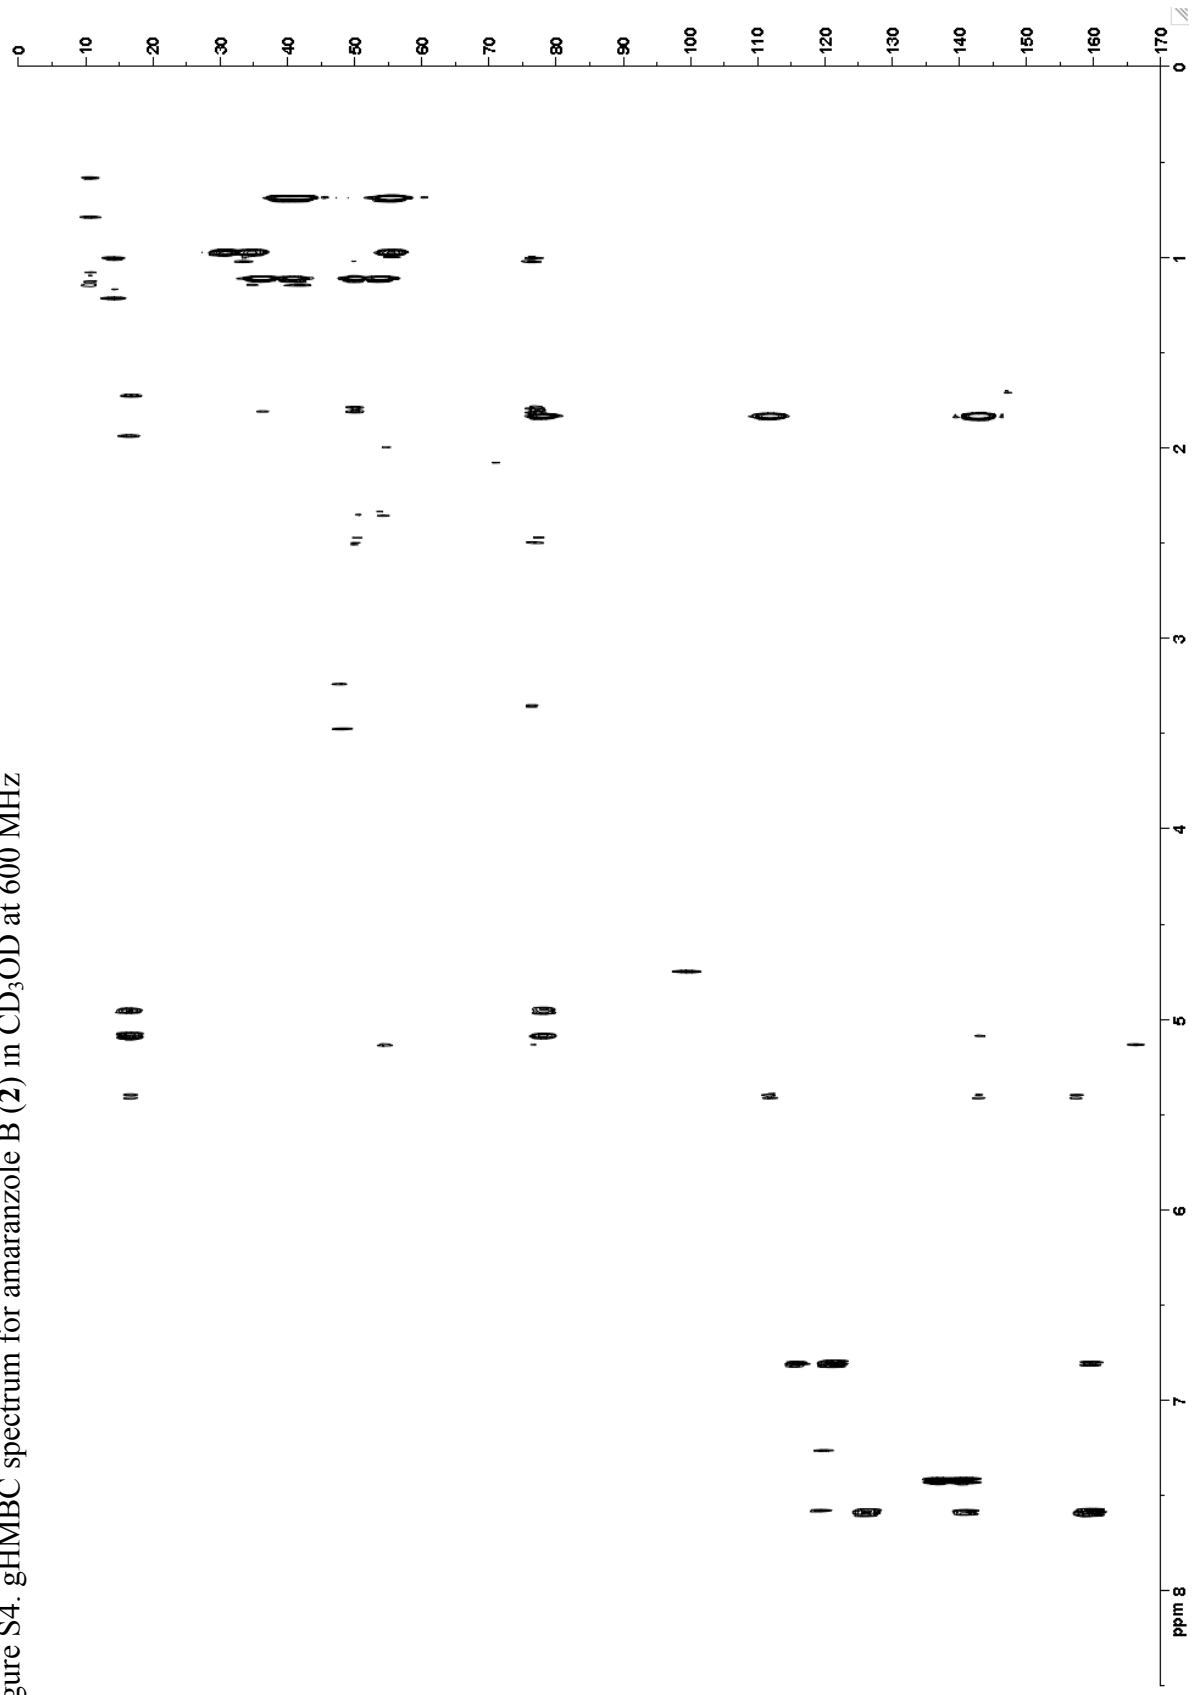

Figure S5.  $^1\text{H}$  NMR spectrum for amaranzole C (**3**) in  $\text{CD}_3\text{OD}$  at 600 MHz

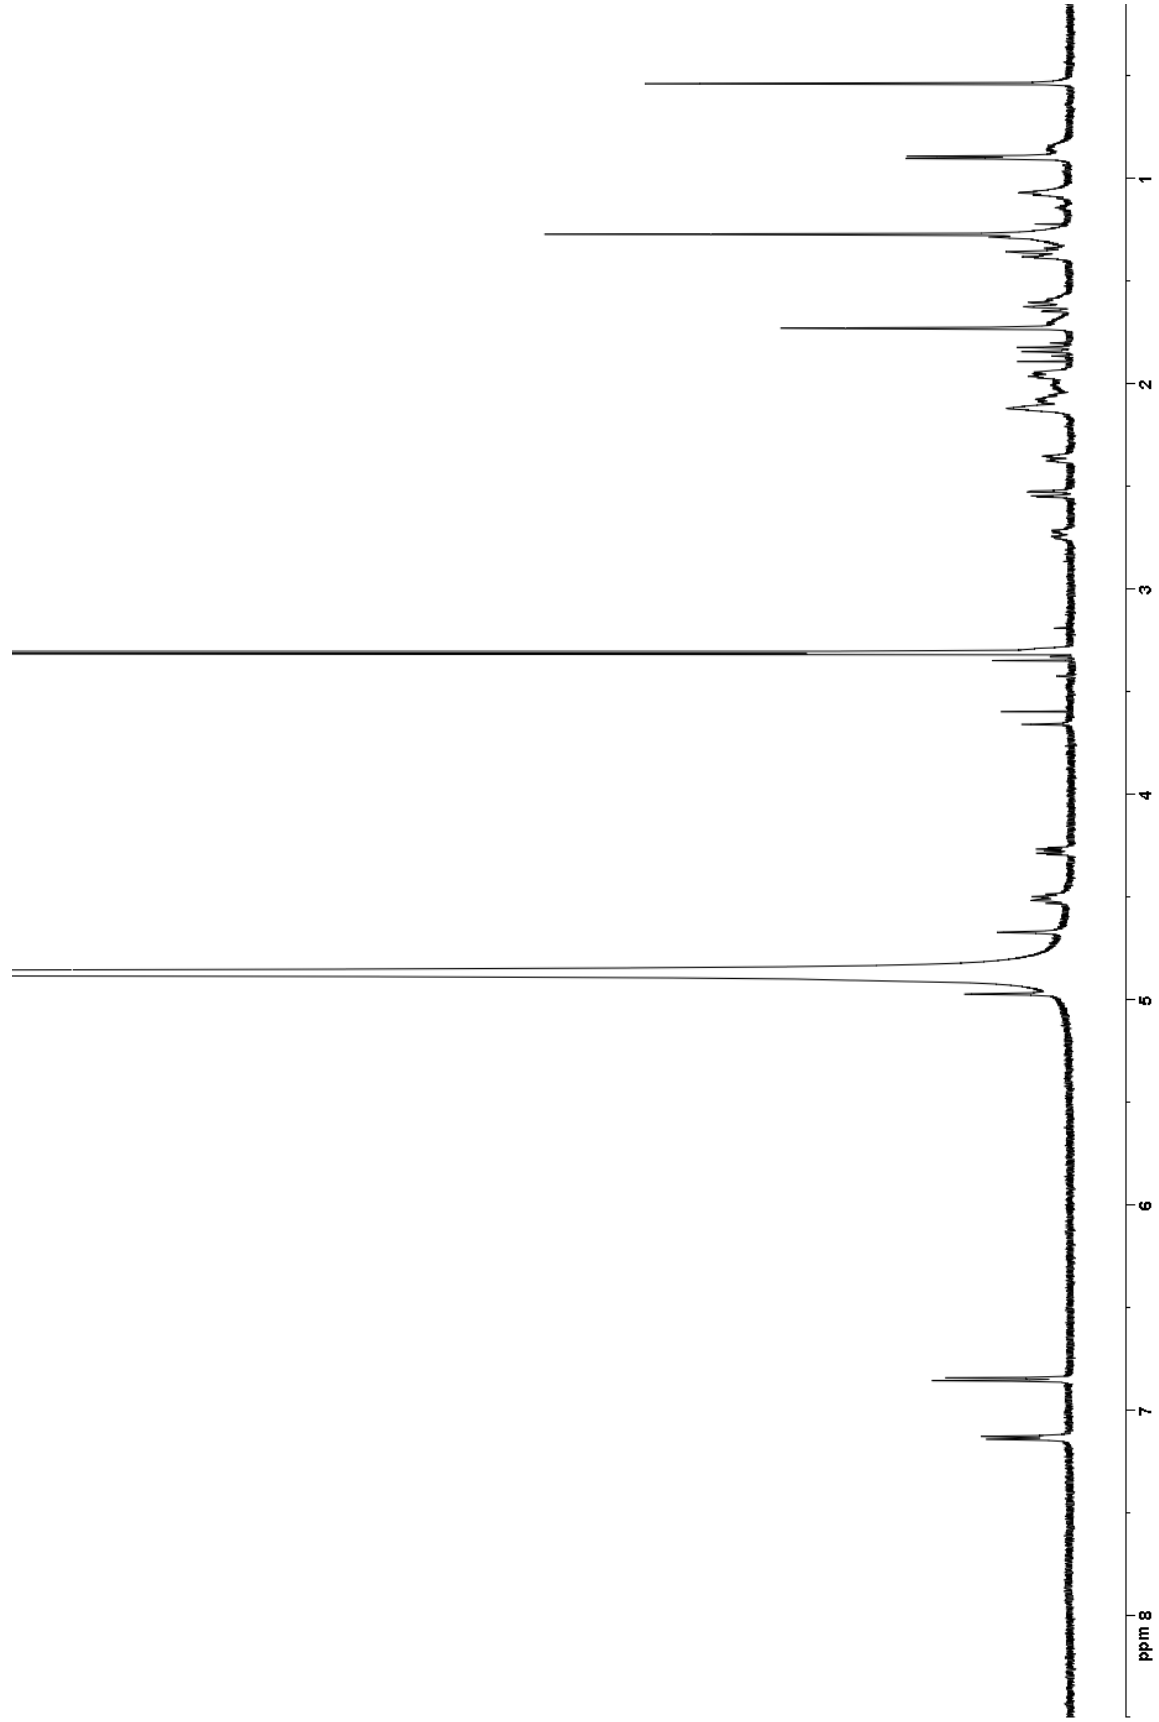

Figure S6.  $^1\text{H}$  NMR spectrum for amaranzole D (4) in  $\text{CD}_3\text{OD}$  at 600 MHz

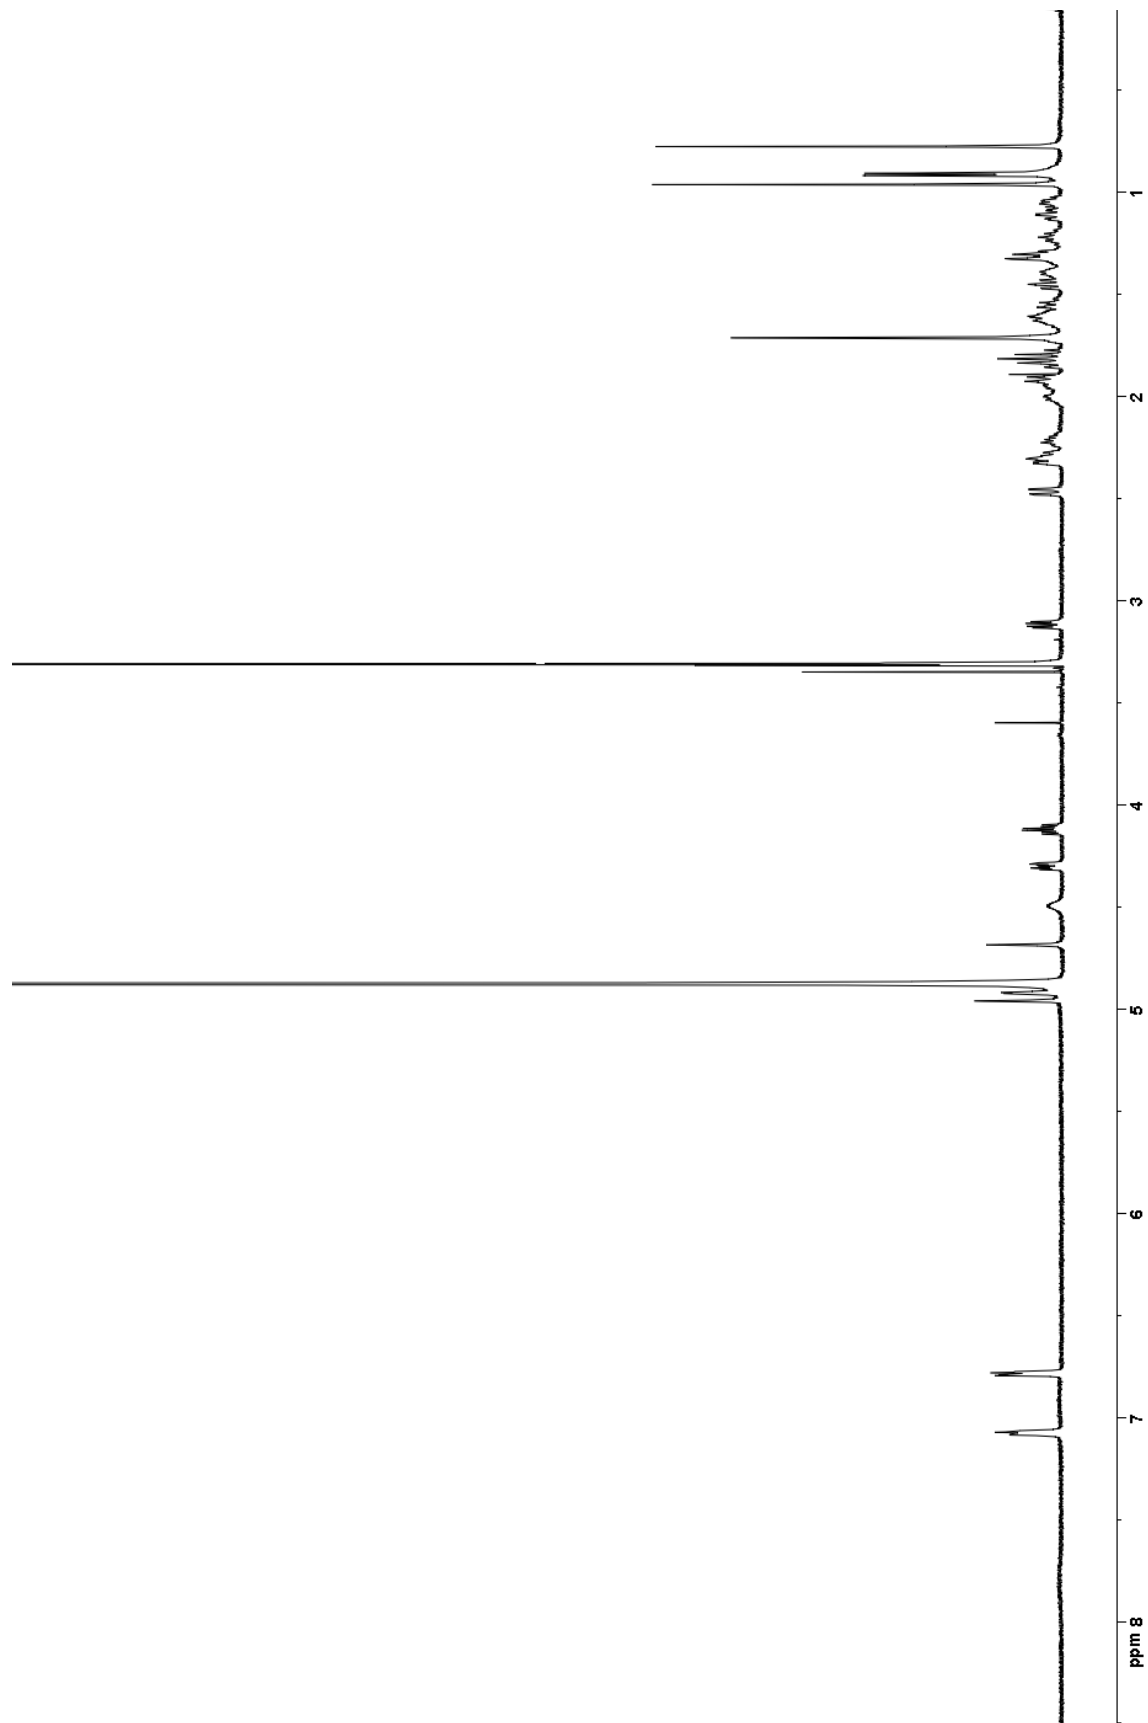

Figure S7.  $^1\text{H}$  NMR spectrum for amaranzole E (**5**) in  $\text{CD}_3\text{OD}$  at 600 MHz

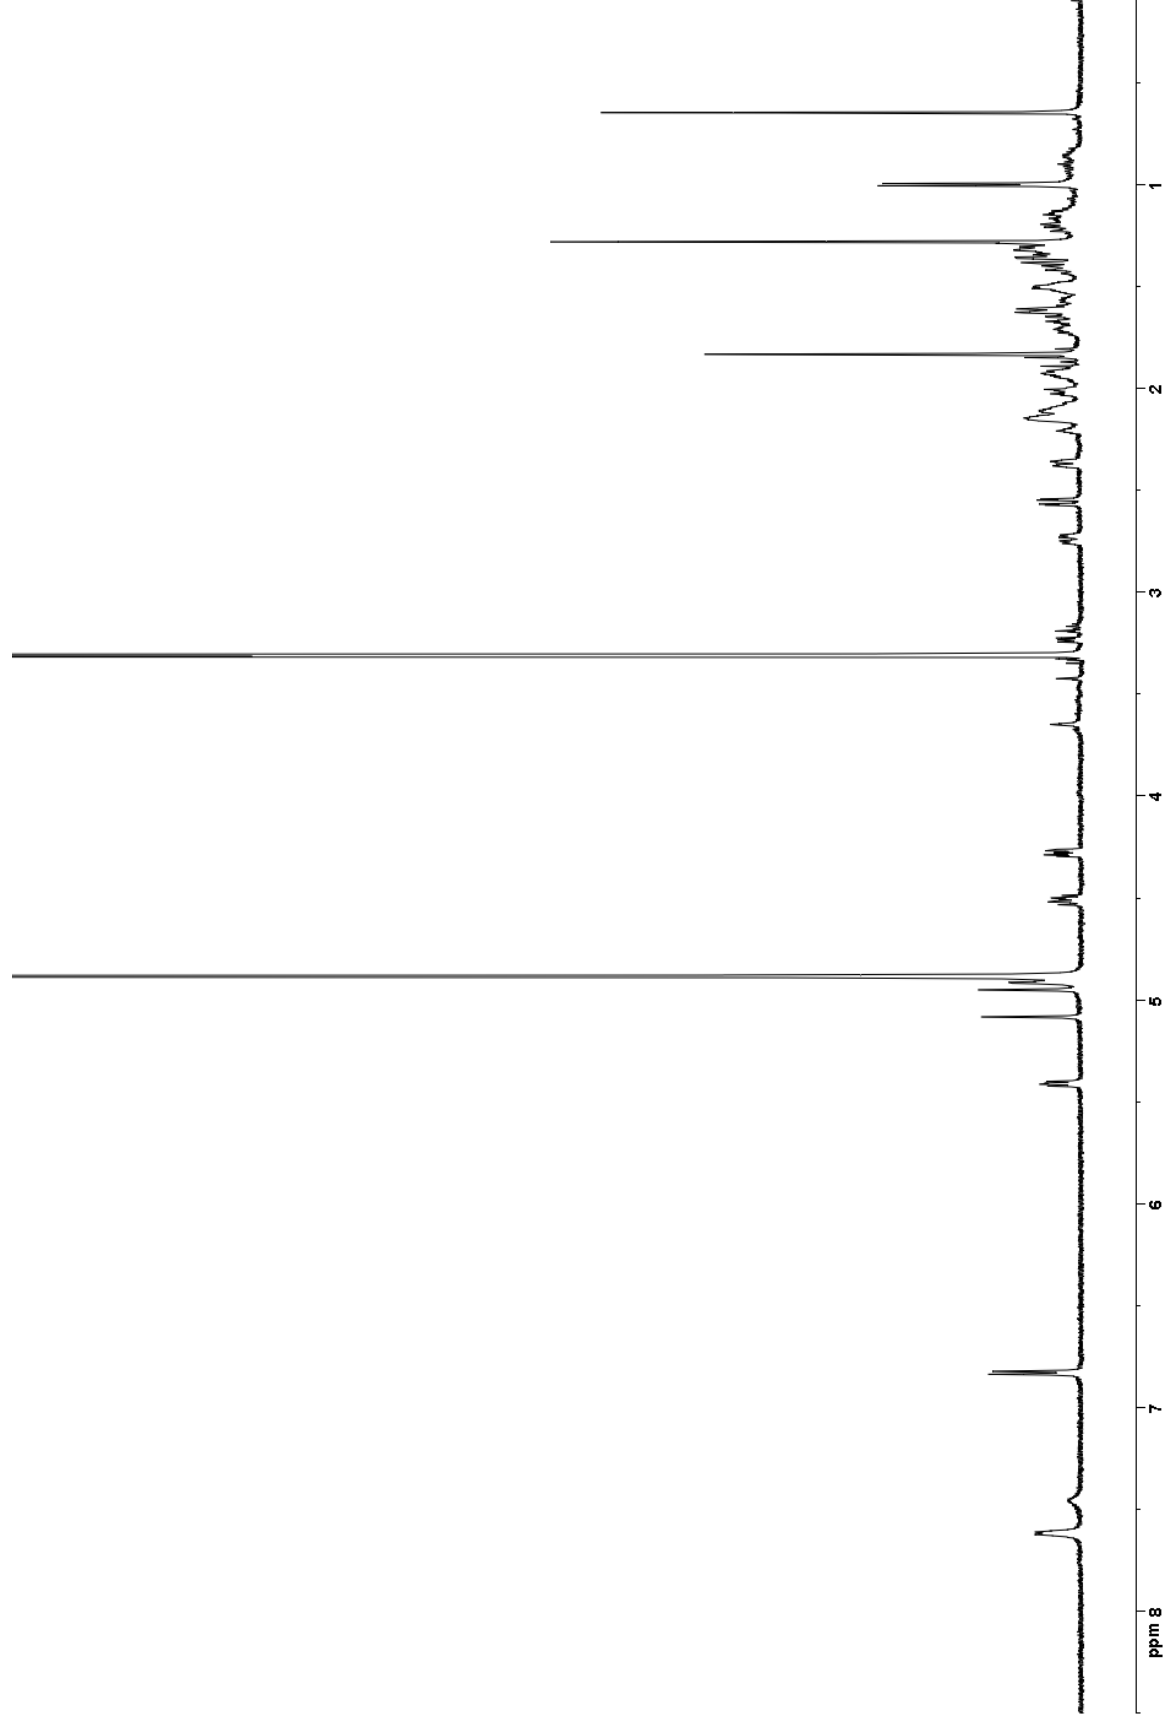



Figure S8.  $^1\text{H}$  NMR spectrum for amaranzole F (6) in  $\text{CD}_3\text{OD}$  at 600 MHz

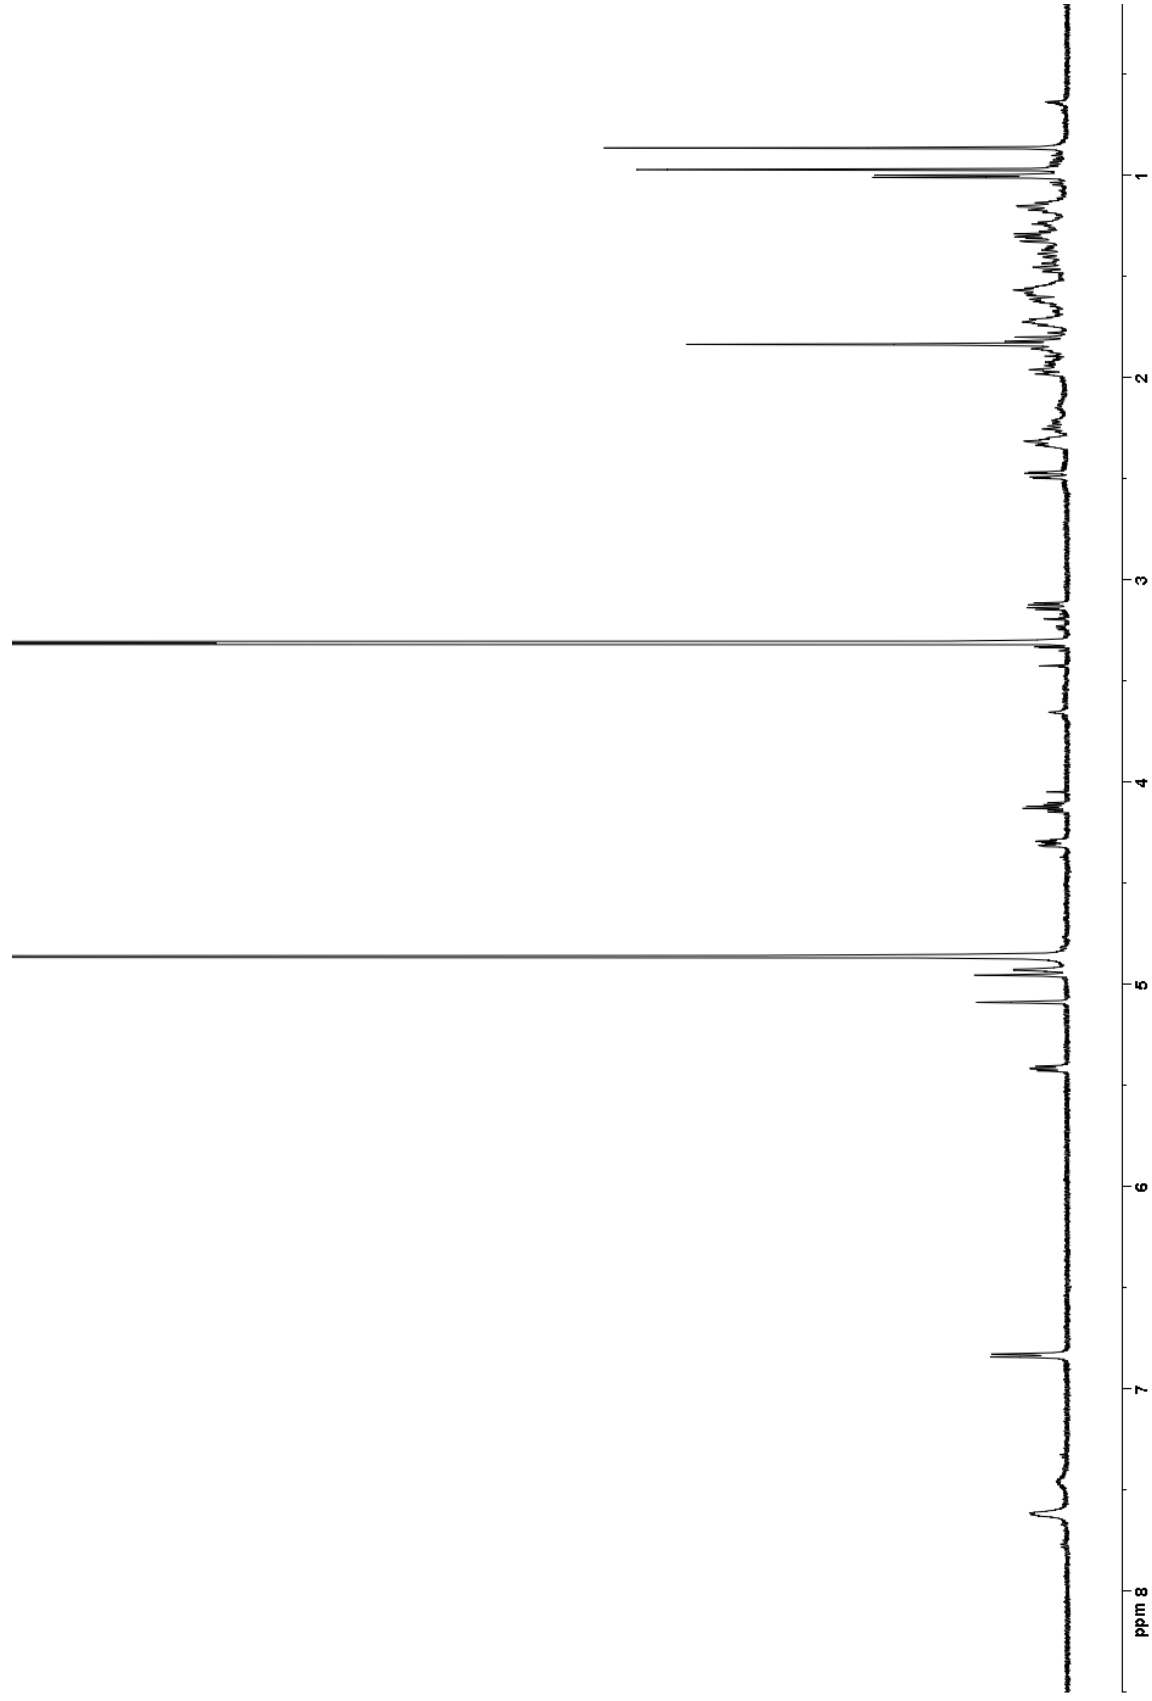

Figure S9. <sup>1</sup>H NMR spectrum for N,O-dimethyl-amaranzole B (7) in CD<sub>3</sub>OD at 600 MHz

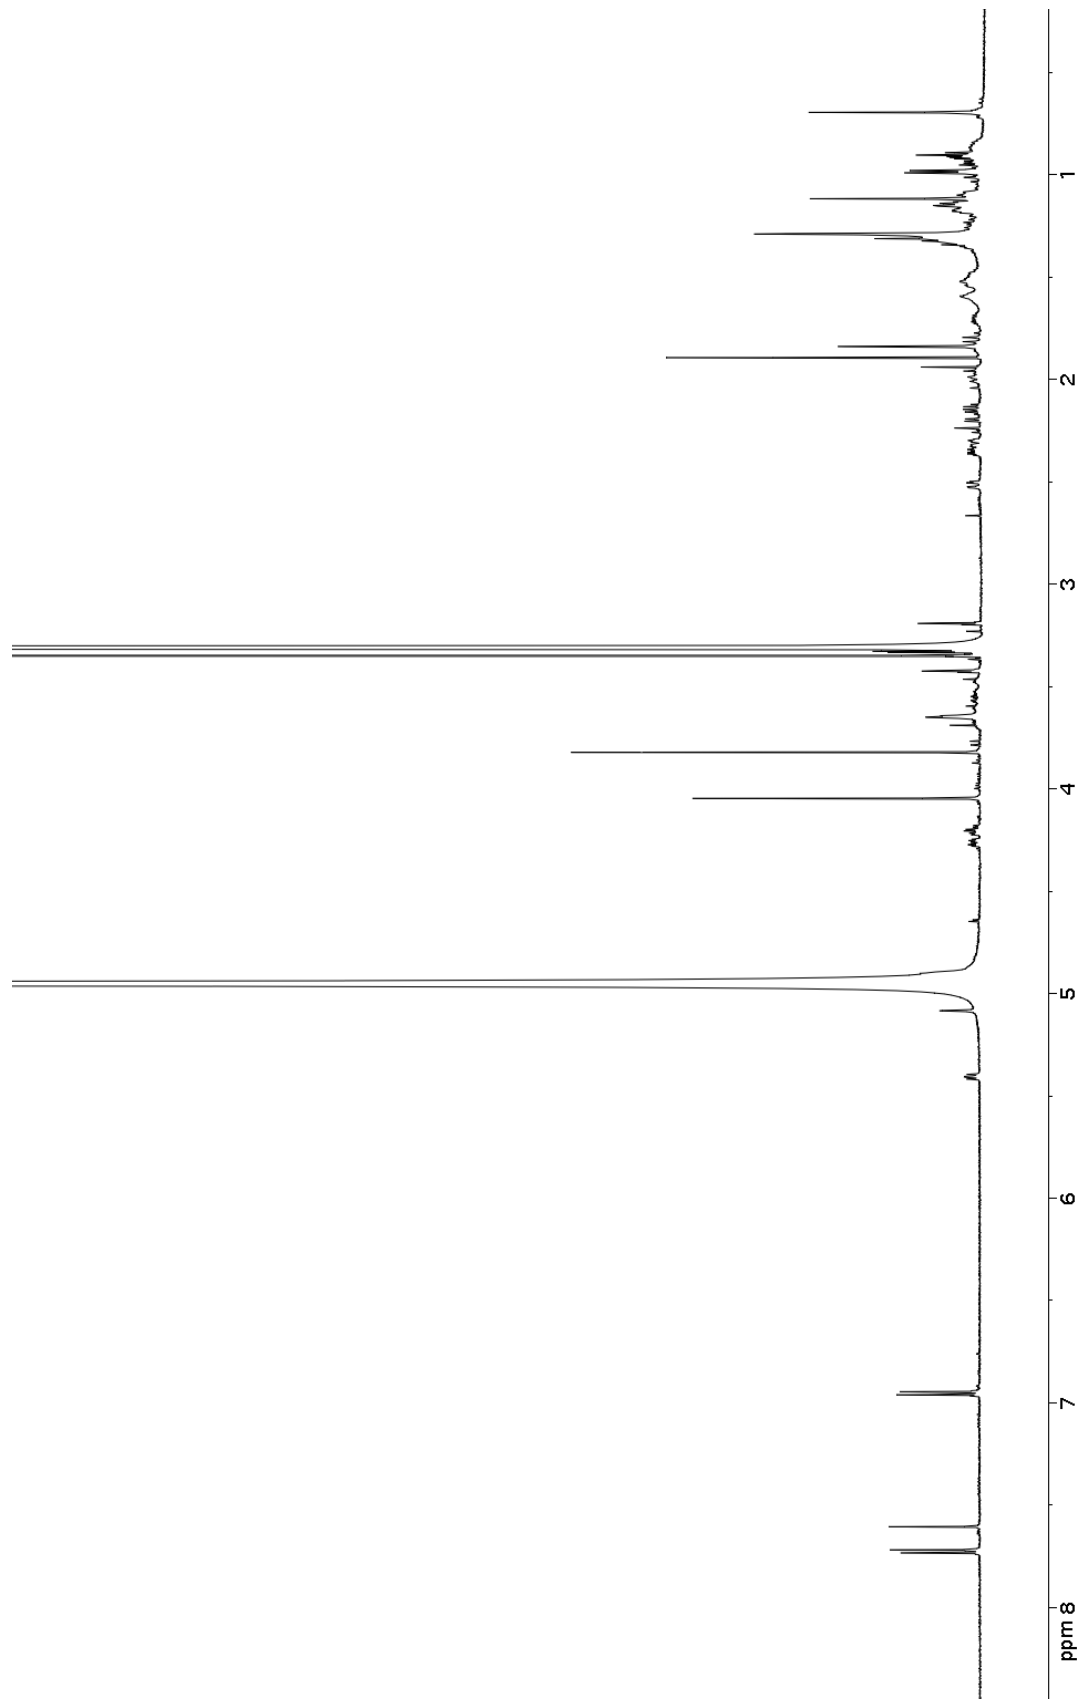

Figure S10. <sup>1</sup>H NMR spectrum for compound 14 in CDCl<sub>3</sub>+0.1% TFA-*d* at 400 MHz

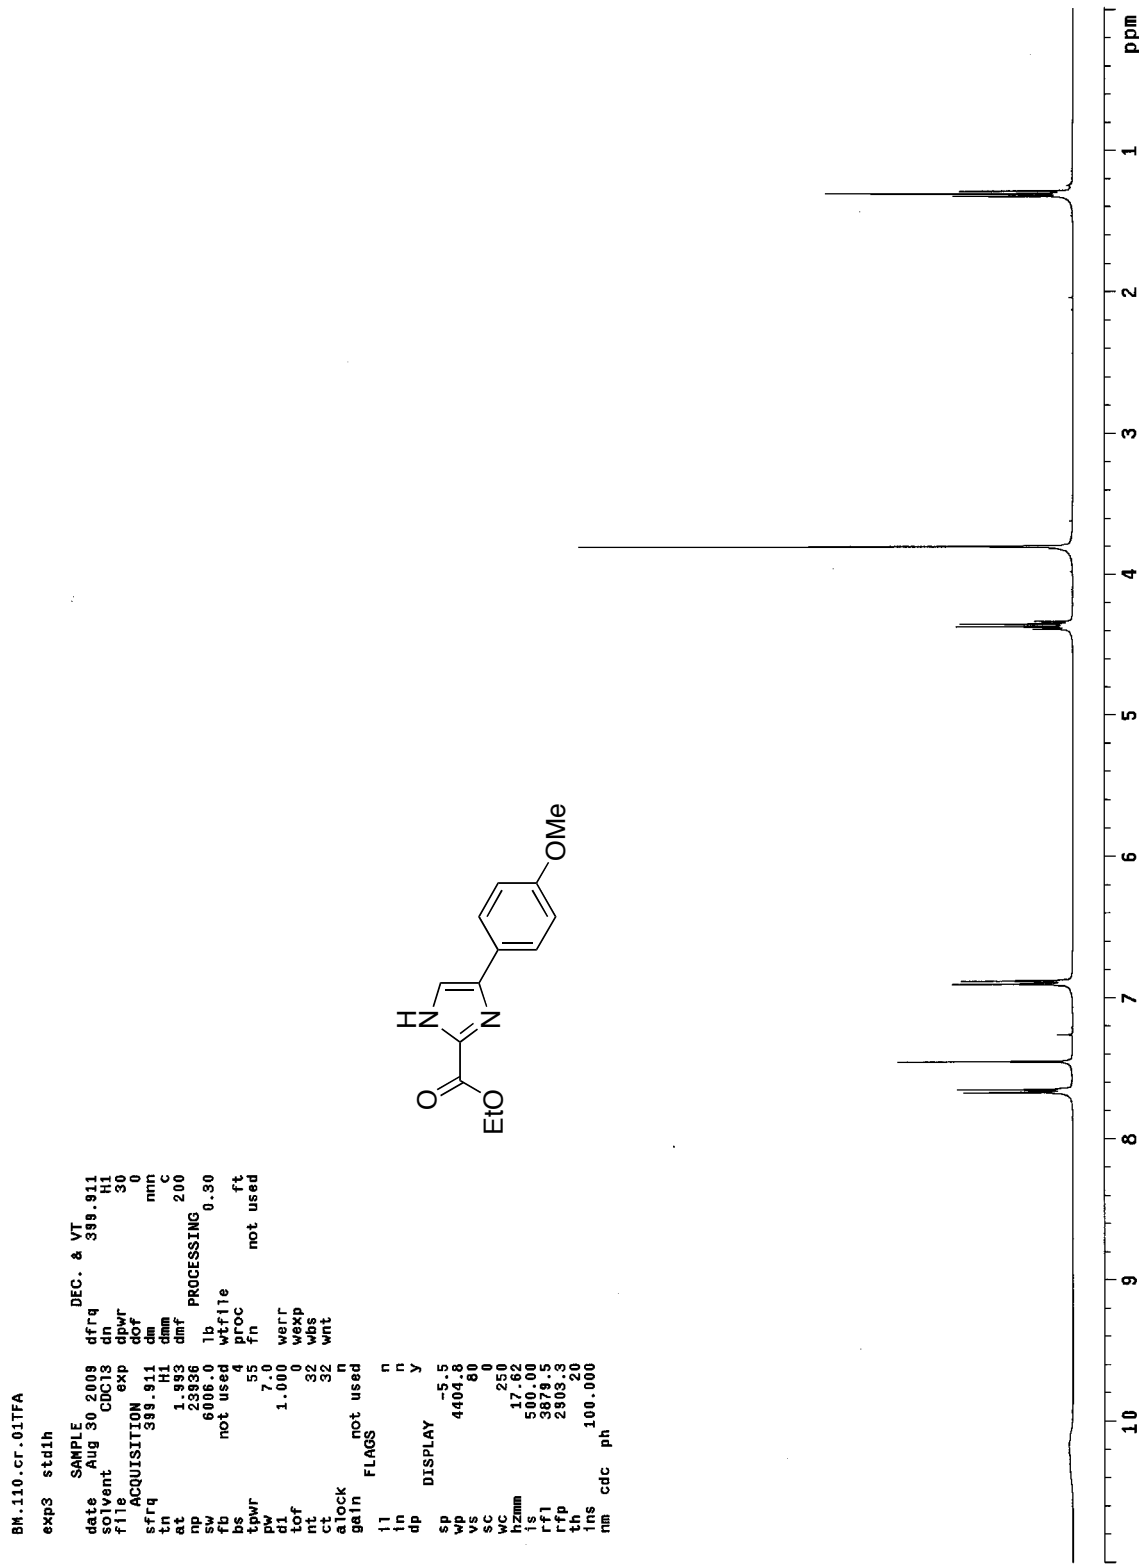

Figure S11. <sup>13</sup>C NMR spectrum for compound **14** in CDCl<sub>3</sub>+0.1% TFA-*d* at 400 MHz

BM.110. cr. 01TFA.13C

Pulse Sequence: s2pu1

Solvent: CDCl<sub>3</sub>

Ambient temperature

Mercury-400BB "hg402"

Relax. delay 1.500 sec

Pulse 55.4 degrees

Width 25900.0 Hz

384 repetitions

OBSERVE C13, 100.5572014 MHz

DECOUPLE H1, 399.9110254 MHz

Power 38 dB

continuously on

WALTZ-16 modulated

DATA PROCESSING

Line broadening 1.0 Hz

FI size 85536

Total time 18 min, 59 sec

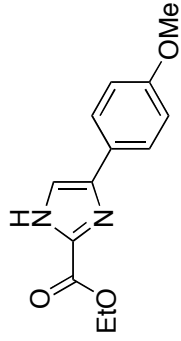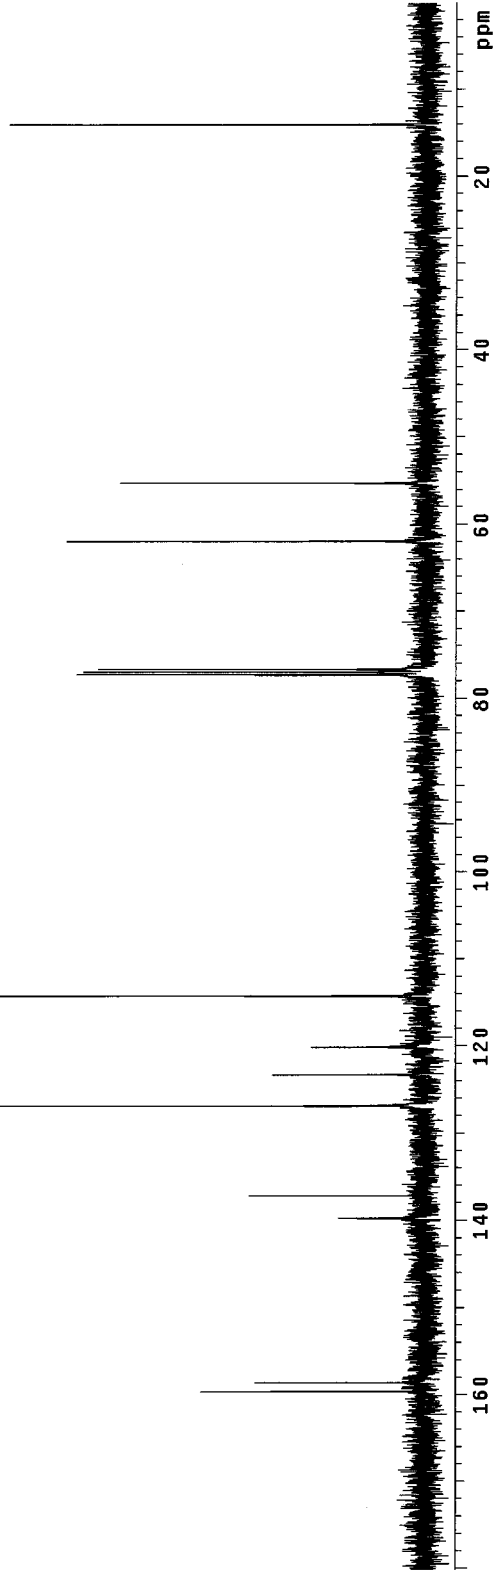



Figure S13. <sup>13</sup>C NMR spectrum for compound **15a** in CDCl<sub>3</sub> at 400 MHz

13C OBSERVE

Pulse Sequence: s2pu1  
Solvent: CDCl<sub>3</sub>  
Ambient temperature  
Mercury-400BB "hg402"

Relax. delay 1.500 sec  
Pulse 53.4 degrees  
Acq. time 1.139 sec  
Width 25000.0 Hz  
7000 repetitions  
OBSERVE CH, 300.5570011 MHz  
PULSE PR, 399.3110254 MHz  
Power 98 dB,  
continuously on  
WALTZ-16 modulated  
DATA PROCESSING  
Line broadening 1.0 Hz  
FT size 65536  
Total time 5 hr, 46 min, 7 sec

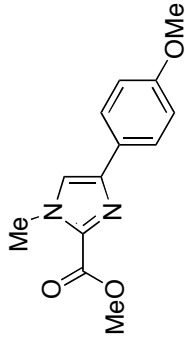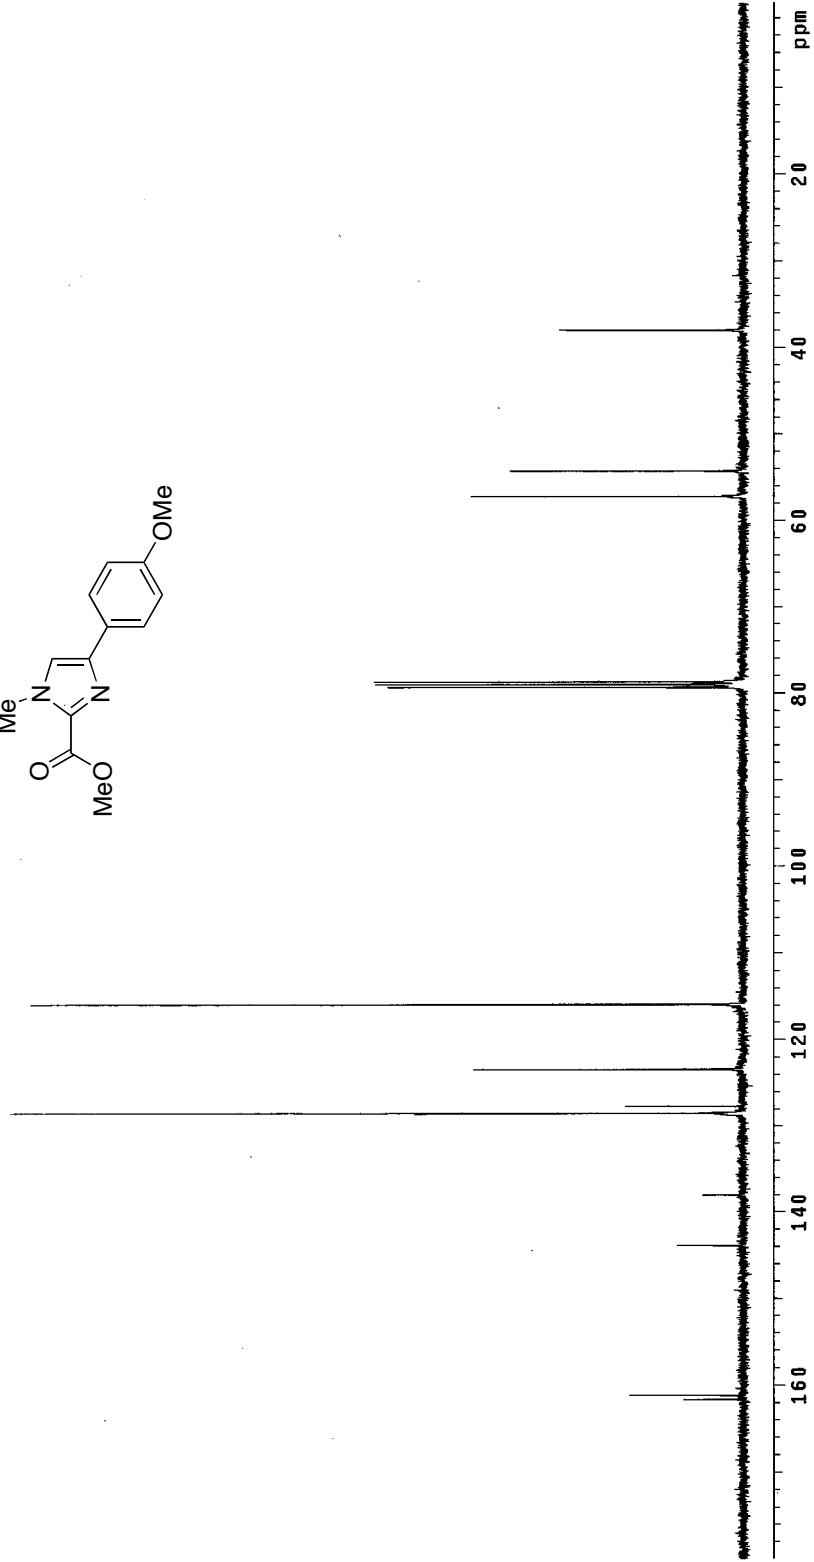

Figure S14. <sup>1</sup>H NMR spectrum for compound **15b** in CDCl<sub>3</sub> at 400 MHz

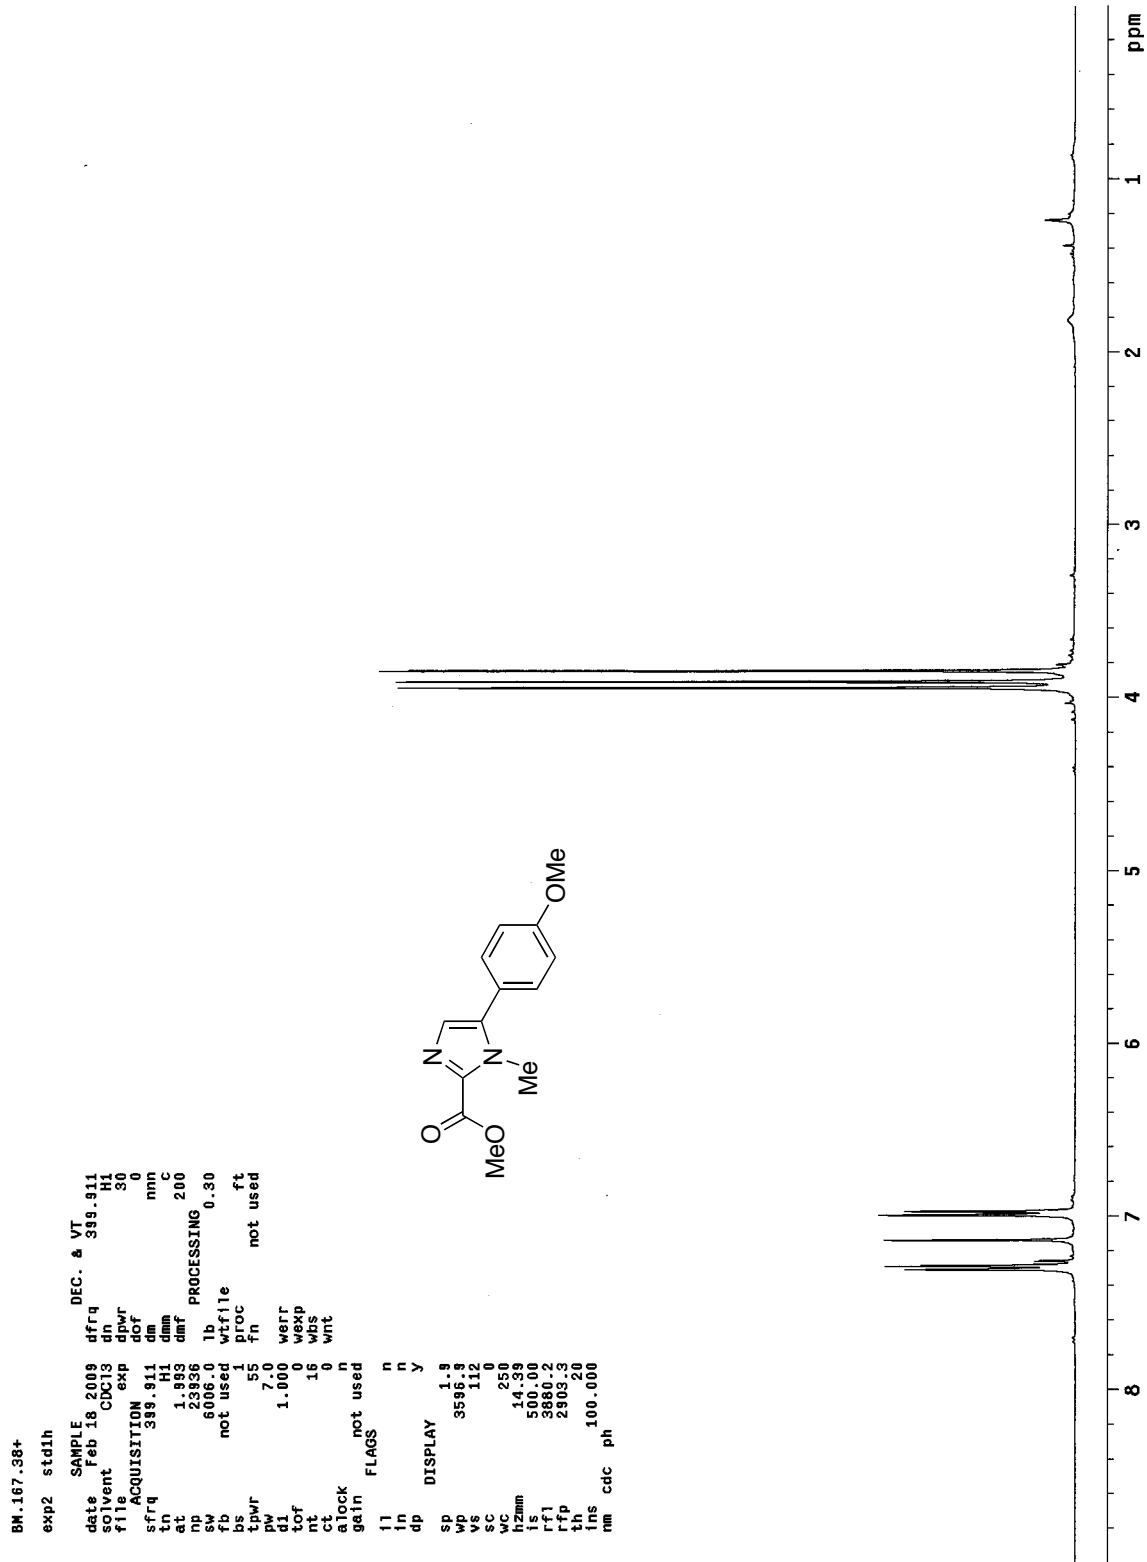

Figure S15.  $^{13}\text{C}$  NMR spectrum for compound **15b** in  $\text{CDCl}_3$  at 400 MHz

BM-167-38+.13C

Pulse Sequence: s2pu  
Solvent:  $\text{CDCl}_3$   
Ambient temperature  
Mercury-400BB "hg402"  
Relax. delay 1.500 sec  
Pulse 52.4 degrees  
Acq. time 1.399 sec  
Width 25000.0 Hz  
1024 repetitions  
OBSERVE C13, 100.5572029 MHz  
DECOUPLE H1, 399.9110254 MHz  
Power 38 dB  
continuously on  
WALTZ-16 modulated  
DATA PROCESSING  
Line broadening 1.0 Hz  
File size 65536  
Total time 30 min, 37 sec

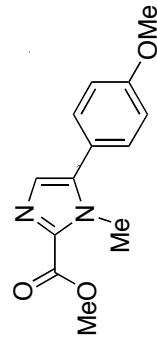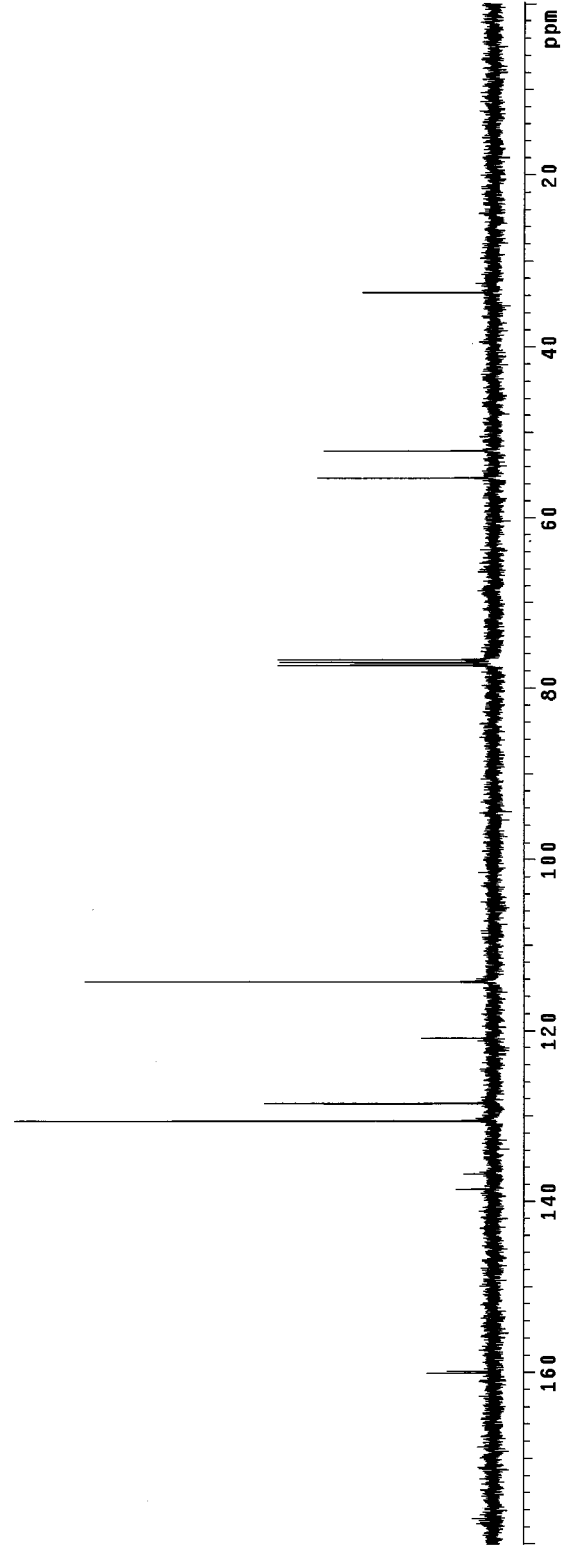





Figure S17.  $^{13}\text{C}$  NMR spectrum for compound **10** in  $\text{DMSO}-d_6$  at 400 MHz

BM.166.29-37.L10H.13C  
Pulse Sequence: s2pul  
Solvent: DMSO  
Amplitude: 60000  
Mercury-400BB "hg402"  
Relax. delay 2.000 sec  
Pulse 53.4 degrees  
Width 38.000 Hz  
Width 38.000 Hz  
720 repetitions  
OBSERVE C13, 100.557200 MHz  
DECOUPLE H1, 399.9128250 MHz  
Power 38 dB,  
continuously on  
WALTZ-16 modulated  
DATA PROCESSING  
Line broadening 1.0 Hz  
FT size 65536  
Total time 59 min, 9 sec

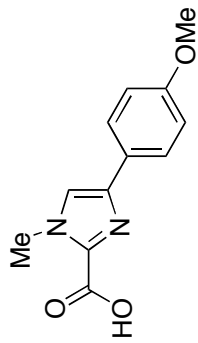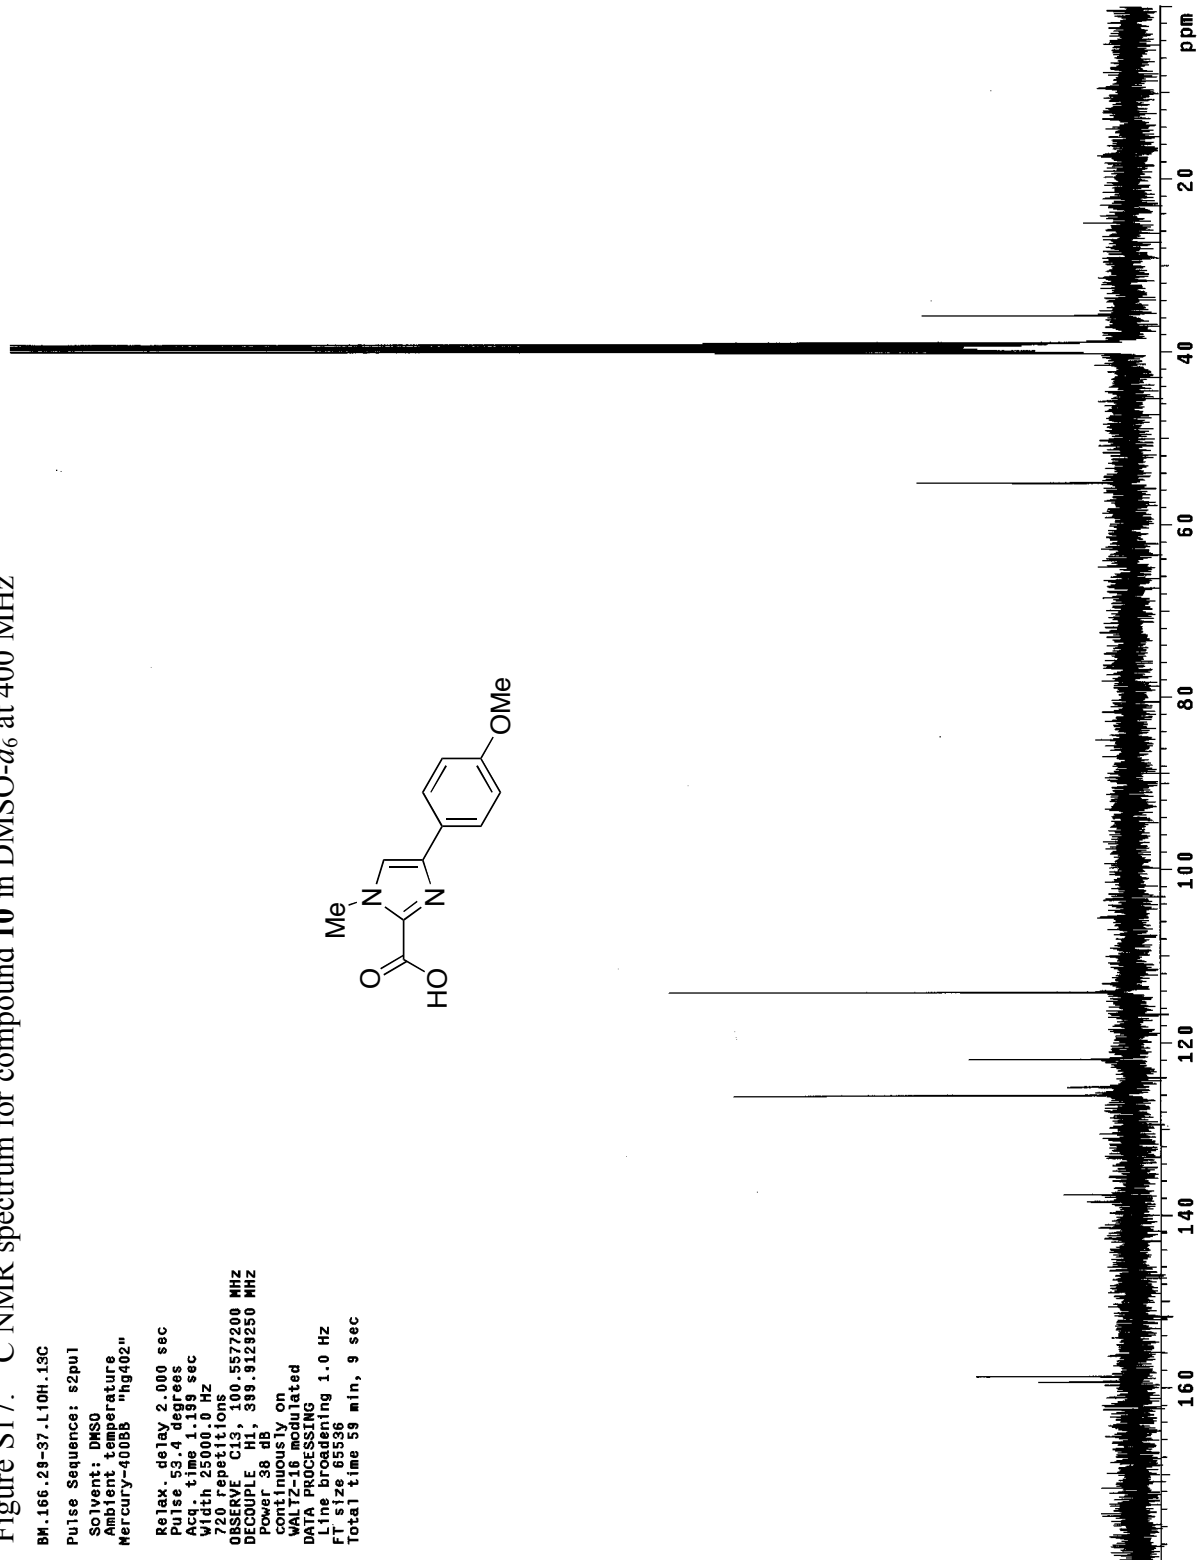

Figure S18. <sup>1</sup>H NMR spectrum for compound (±)-**8** in CD<sub>3</sub>OD at 400 MHz

BM.165.25-31.C030D

exp2 std1h

|             |          |            |
|-------------|----------|------------|
| date        | SAMPLE   | DEC. & VT  |
| Feb 9 2009  | Feb      | 399.913    |
| solvent     | cd3od    | H1         |
| file        | exp      | dn         |
| ACQUISITION | exp      | dpwr       |
| 399.913     | 0        | 30         |
| sfreq       | dm       | dof        |
| 399.913     | dm       | 0          |
| at          | dmf      | min        |
| 1.992       | dmf      | 200        |
| np          | dmf      | PROCESSING |
| 23938       | 0.30     | ft         |
| sw          | 6006.0   | lb         |
| not used    | not used | fn         |
| fb          | 16       | proc       |
| bs          | 55       | not used   |
| tpwr        | 7.0      | werr       |
| pw          | 1.000    | wexp       |
| d1          | 0        | wbs        |
| tof         | 32       | wnt        |
| nt          | 32       |            |
| clock       | n        |            |
| gain        | not used |            |
| FLAGS       | n        |            |
| l1          | n        |            |
| in          | n        |            |
| dp          | y        |            |
| sp          | -2.2     | DISPLAY    |
| wp          | 3603.1   |            |
| vs          | 137      |            |
| sc          | 0        |            |
| sz          | 250      |            |
| hzmm        | 14.41    |            |
| is          | 500.00   |            |
| rfl         | 2288.4   |            |
| rfp         | 1323.7   |            |
| th          | 100.000  |            |
| ins         | cdc      |            |
| nm          | ph       |            |

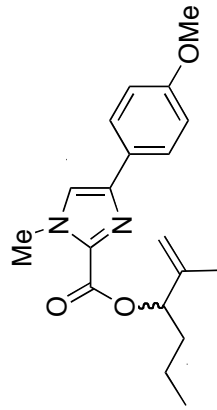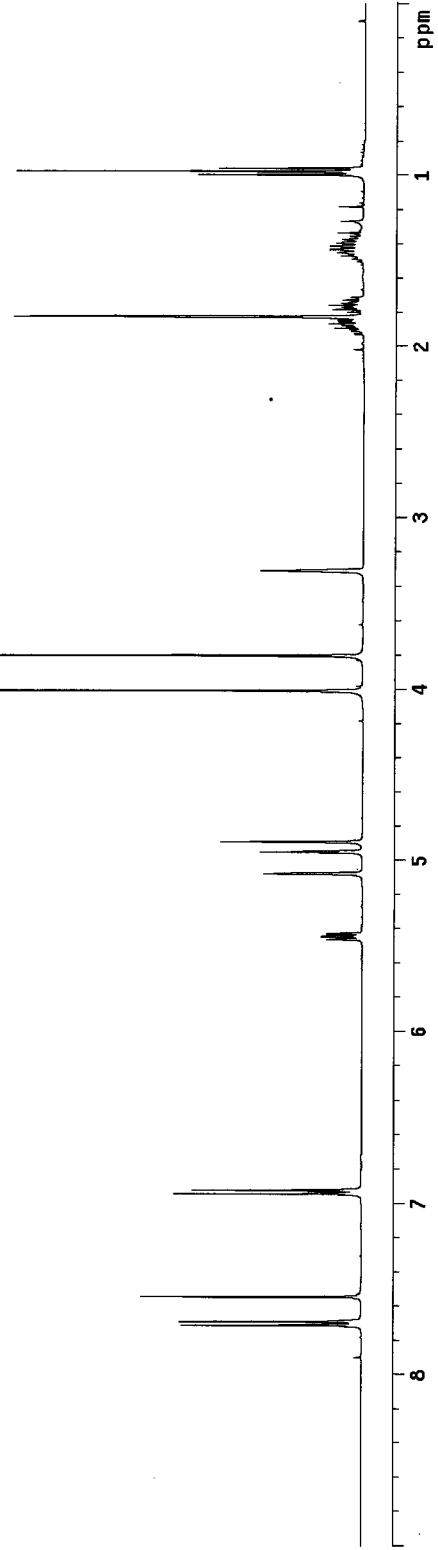

Figure S19.  $^{13}\text{C}$  NMR spectrum for compound ( $\pm$ )-**8** in  $\text{CD}_3\text{OD}$  at 400 MHz

BM.165.25-31.CD3OD.13C

Pulse Sequence: s2pul  
Solvent: CD3OD  
Ambient temperature  
Mercury-400BB "hg402"

Relax. delay 2.000 sec  
Pulse 59.4 degrees  
Acq. time 1.189 sec  
Width 25000.0 Hz  
176 Repetitions  
OBSERVE C13, 100.5574523 MHz  
DECOUPLE H1, 99.9126011 MHz  
Power 38 dB  
continuously on  
DVT1 FID  
MULTI PROCESSED  
LINE BROUGHTING 1.0 HZ  
FT size 65536  
Total time 59 min, 9 sec

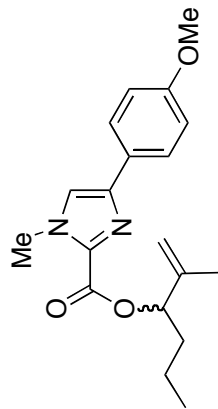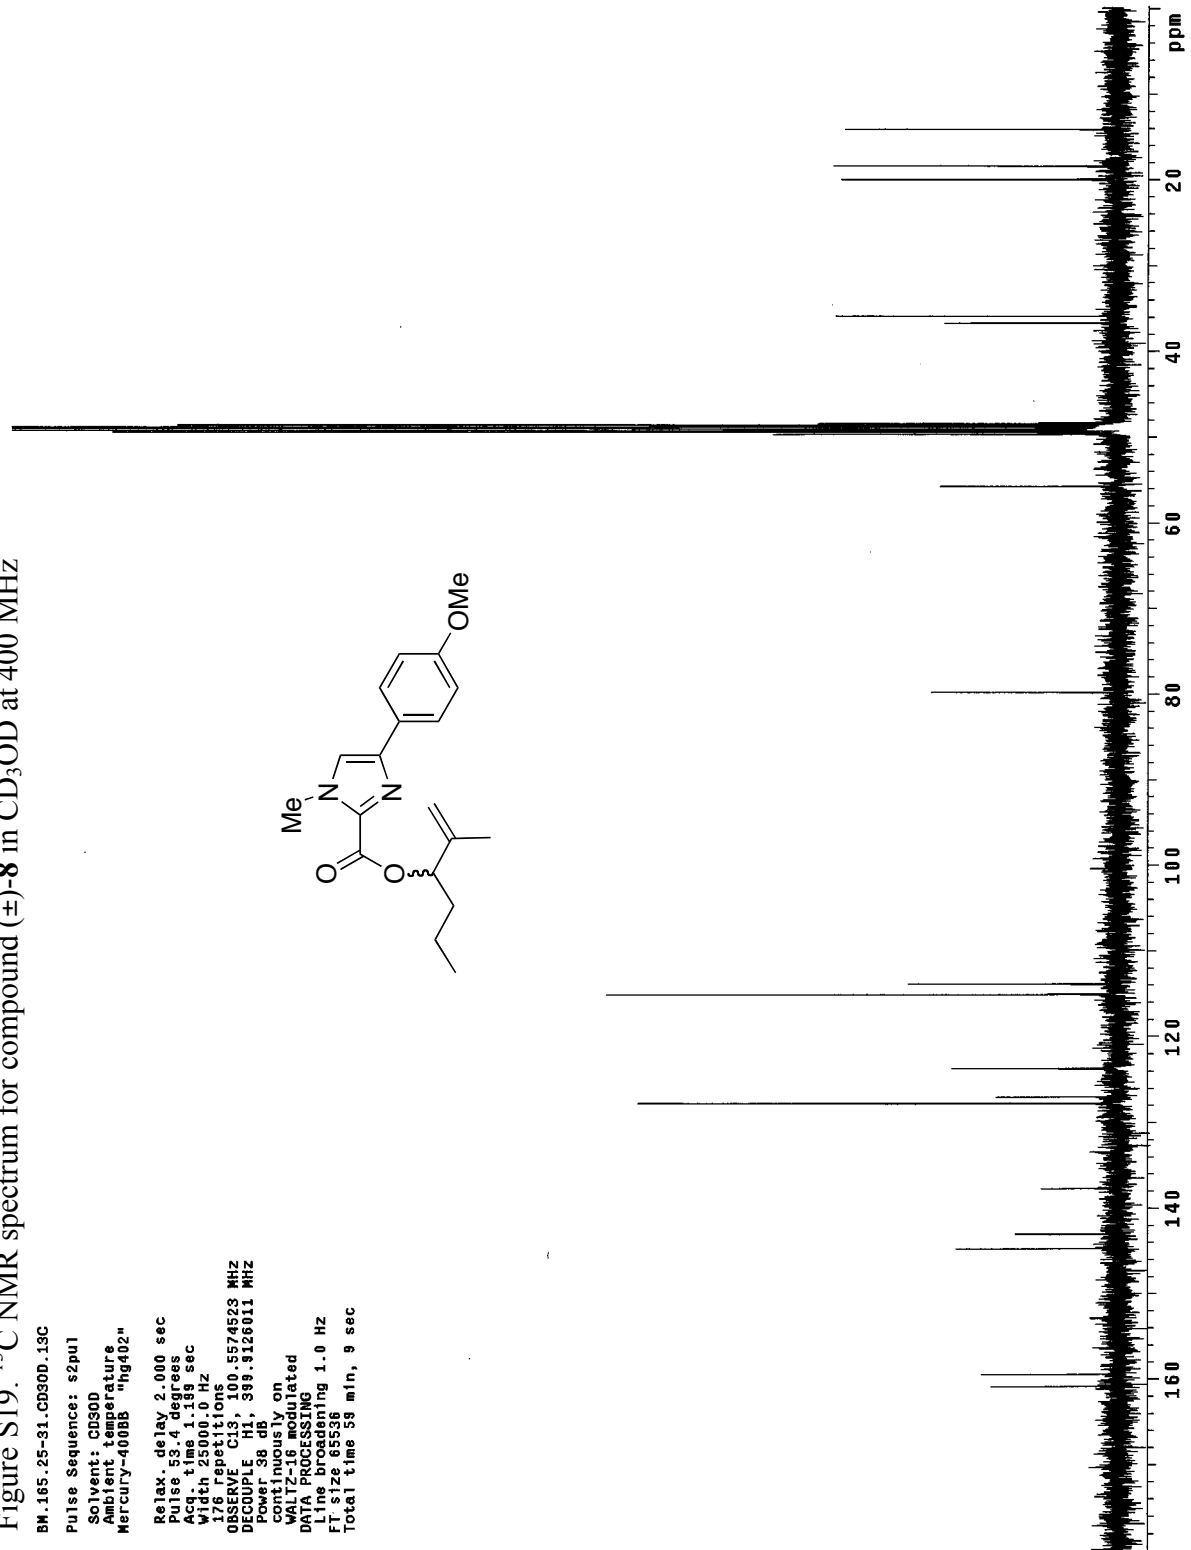

Figure S20. <sup>1</sup>H NMR spectrum for compound (-)-(R)-9 in CD<sub>3</sub>OD at 400 MHz

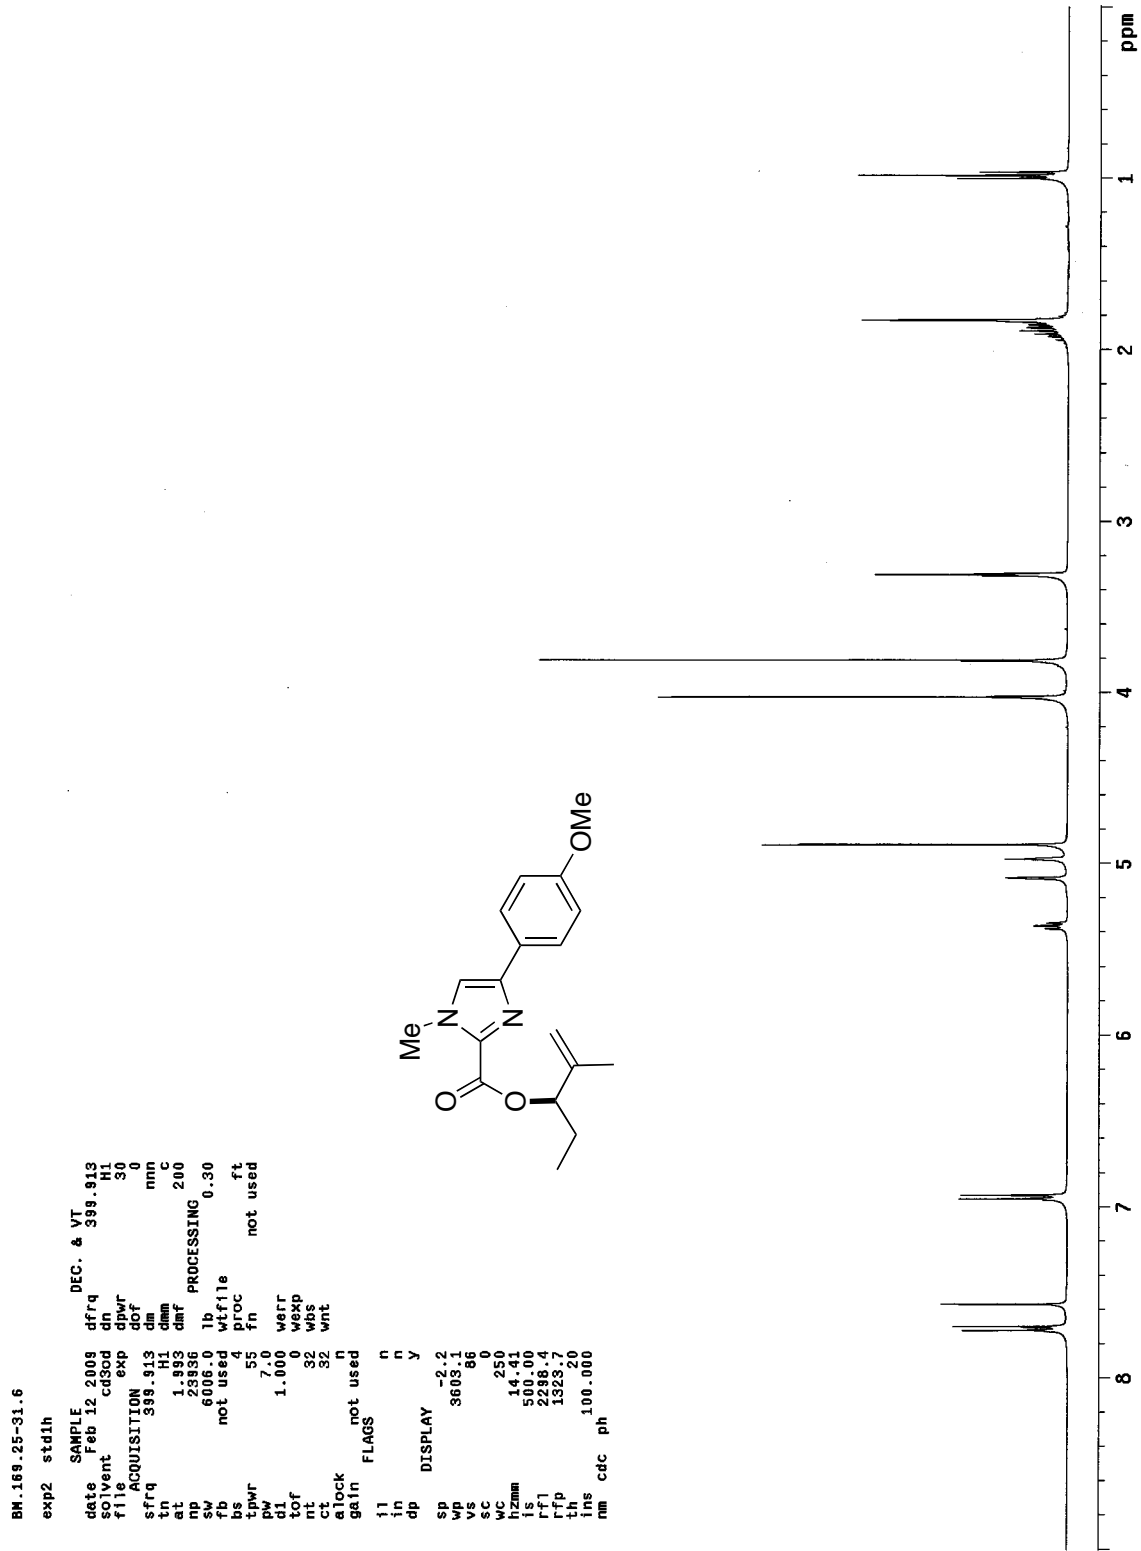

Figure S21. <sup>13</sup>C NMR spectrum for compound (-)-(R)-9 in CD<sub>3</sub>OD at 400 MHz

BN.169.25-31.6.13C

Pulse Sequence: s2pu1  
Solvent: cd3od  
Ambient temperature  
Mercury-400BB "hg402"

Relax. delay 1.500 sec  
Pulse 53.4 degrees  
Acq. time 1.199 sec  
Width 25000.0 Hz  
8000 repetitions  
OBSERVE C13, 100.5574515 MHz  
PCOUPLE H1, 399.8126011 MHz  
Continuously on  
WALTZ-16 modulated  
DATA PROCESSING  
Line broadening 1.0 Hz  
FT size 65536  
Total time 6 hr, 35 min, 31 sec

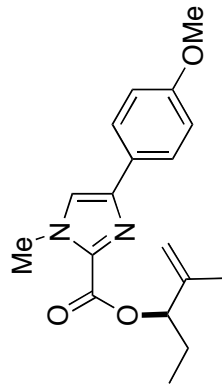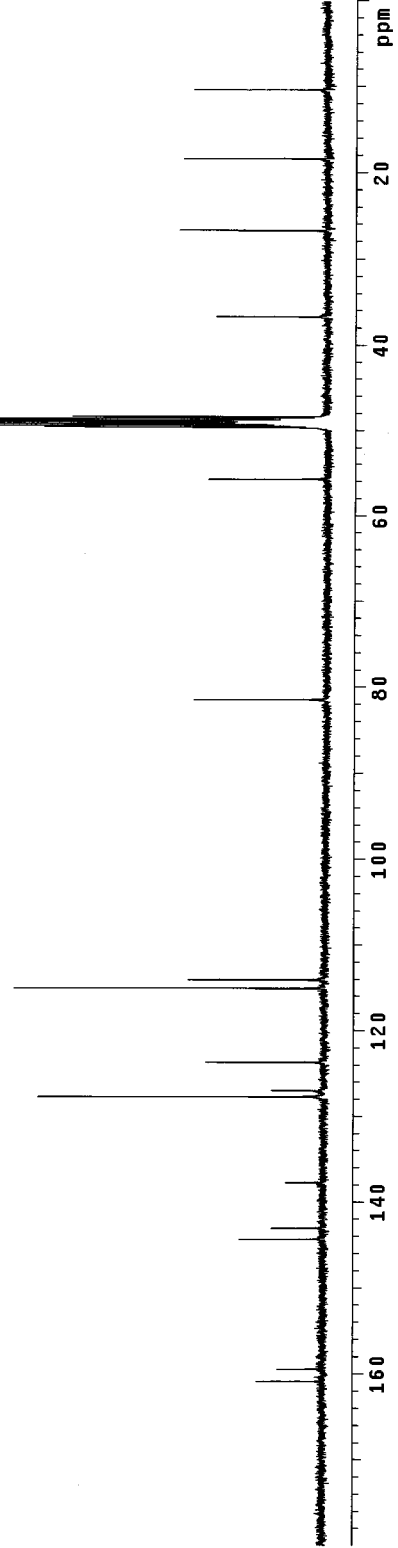

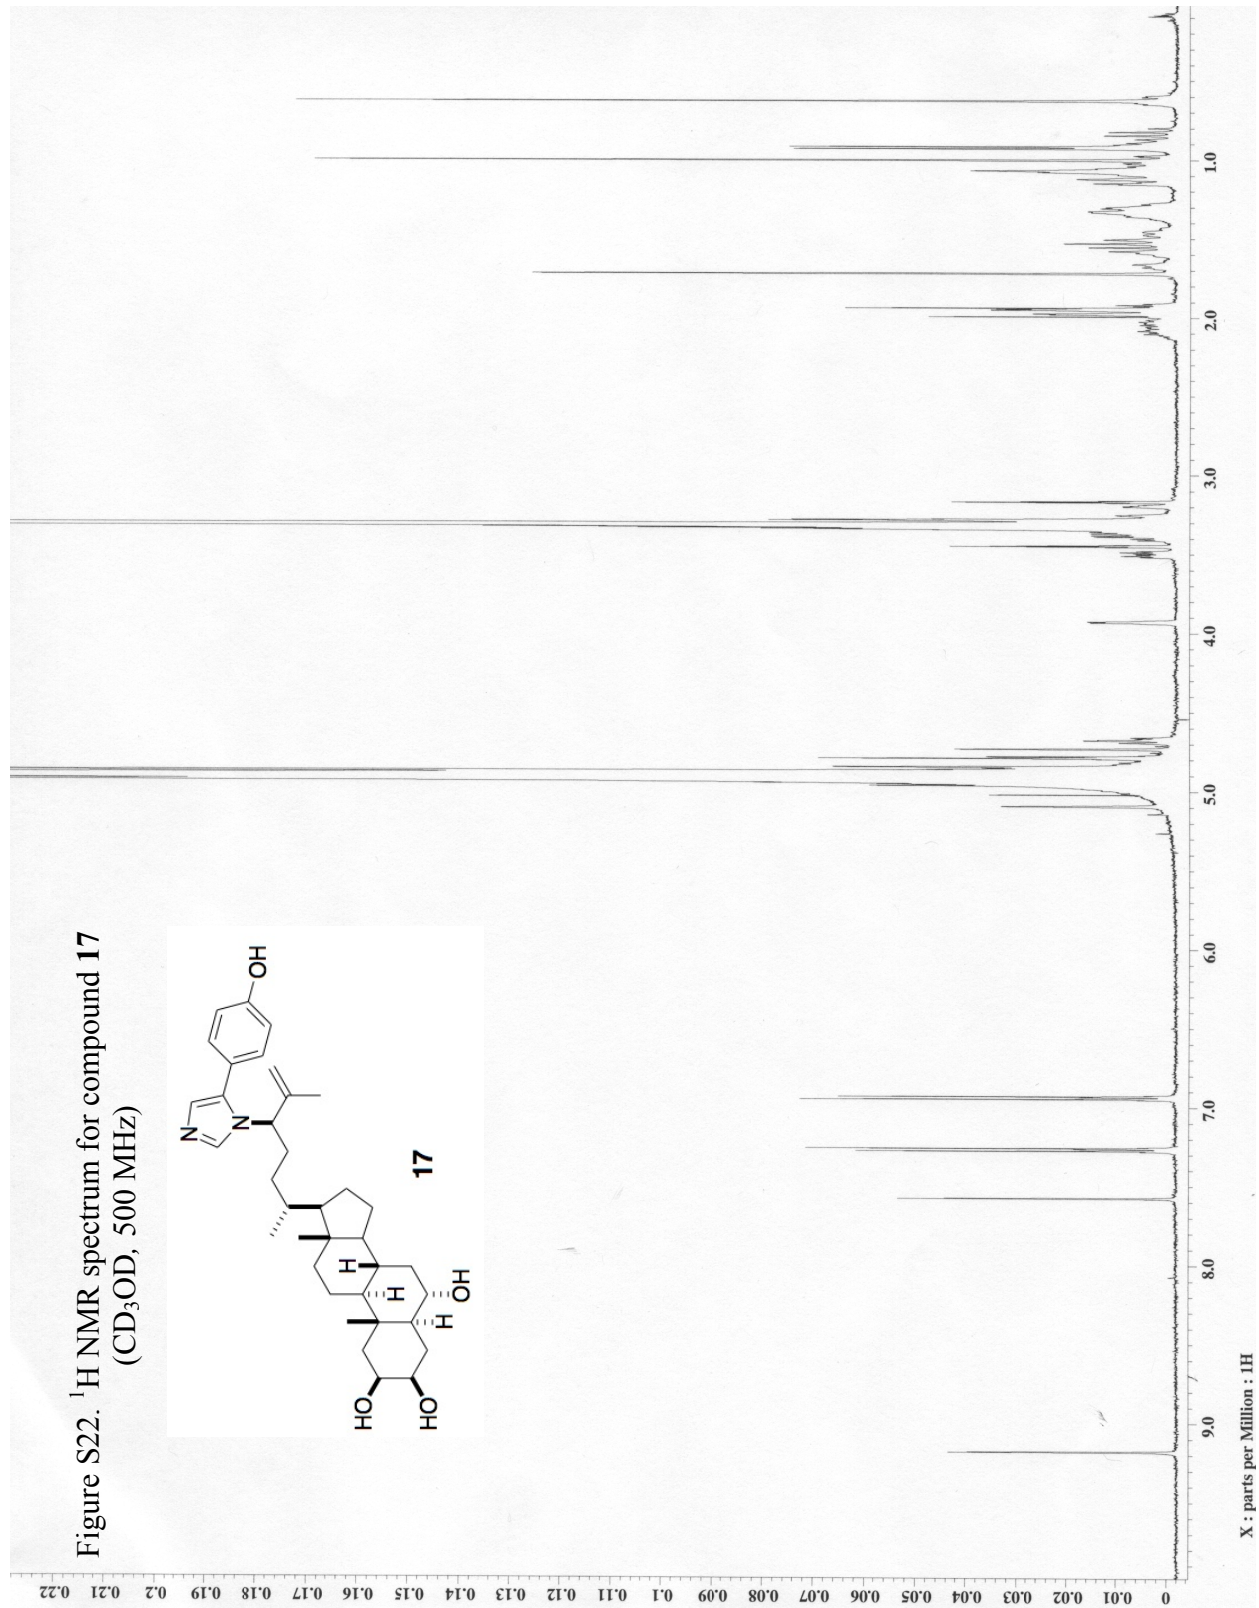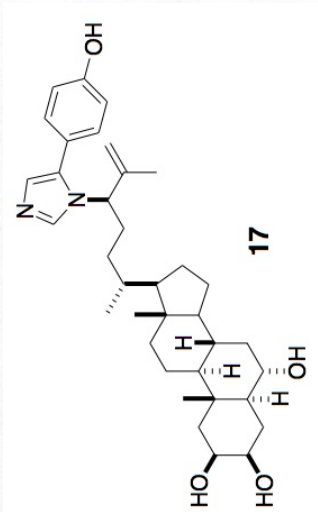

Supplement: NIHMS188978-supplement-1_si_001.pdf [file NIHMS188978-supplement-1_si_001.pdf]
